# Supplementary material for: Patient preferences for venous thromboembolism prophylaxis after injury: a discrete choice experiment
Source: PubMed Central journal article supplement — BMJ Open. 2017 Aug 11;7(8):e016676. doi: 10.1136/bmjopen-2017-016676 (PMC5629686; doi:10.1136/bmjopen-2017-016676), 2017-08-11
Supplement: bmjopen-2017-016676.draft_revisions.pdf [file bmjopen-2017-016676.draft_revisions.pdf]

# BMJ Open

## Patient Preferences for Venous Thromboembolism Prophylaxis After Injury: A Discrete Choice Experiment

|                                 |                                                                                                                                                                                                                                                                                                                                                                                                                                                                                                                                                                                                                                                                    |
|---------------------------------|--------------------------------------------------------------------------------------------------------------------------------------------------------------------------------------------------------------------------------------------------------------------------------------------------------------------------------------------------------------------------------------------------------------------------------------------------------------------------------------------------------------------------------------------------------------------------------------------------------------------------------------------------------------------|
| Journal:                        | <i>BMJ Open</i>                                                                                                                                                                                                                                                                                                                                                                                                                                                                                                                                                                                                                                                    |
| Manuscript ID                   | bmjopen-2017-016676                                                                                                                                                                                                                                                                                                                                                                                                                                                                                                                                                                                                                                                |
| Article Type:                   | Research                                                                                                                                                                                                                                                                                                                                                                                                                                                                                                                                                                                                                                                           |
| Date Submitted by the Author:   | 06-Mar-2017                                                                                                                                                                                                                                                                                                                                                                                                                                                                                                                                                                                                                                                        |
| Complete List of Authors:       | Haac, Bryce; University of Maryland School of Medicine, General Surgery<br>O'Hara, Nathan; University of Maryland School of Medicine, Orthopaedics<br>Mullins, C; University of Maryland School of Pharmacy<br>Stein, DM; R Adams Cowley Shock Trauma Center, University of Maryland School of Medicine<br>Manson, Theodore; University of Maryland School of Medicine, Orthopaedics<br>Johal , Herman; McMaster University,<br>Castillo, Renan; Johns Hopkins University Bloomberg School of Public Health<br>O'Toole, Robert; University of Maryland School of Medicine, Orthopaedics<br>Slobogean, GP ; University of Maryland School of Medicine, Orthopaedics |
| <b>Primary Subject Heading</b>: | Patient-centred medicine                                                                                                                                                                                                                                                                                                                                                                                                                                                                                                                                                                                                                                           |
| Secondary Subject Heading:      | Haematology (incl blood transfusion), Health economics, Surgery                                                                                                                                                                                                                                                                                                                                                                                                                                                                                                                                                                                                    |
| Keywords:                       | Thromboembolism < CARDIOLOGY, Anticoagulation < HAEMATOLOGY, Trauma management < ORTHOPAEDIC & TRAUMA SURGERY, Adult surgery < SURGERY, Orthopaedic & trauma surgery < SURGERY                                                                                                                                                                                                                                                                                                                                                                                                                                                                                     |
|                                 |                                                                                                                                                                                                                                                                                                                                                                                                                                                                                                                                                                                                                                                                    |

SCHOLARONE™  
Manuscripts

1  
2  
3 **Patient Preferences for Venous Thromboembolism Prophylaxis After Injury: A Discrete**  
4  
5 **Choice Experiment**  
6  
7  
8  
9

10 Bryce E. Haac, MD<sup>1</sup>; Nathan N. O'Hara, MHA<sup>1</sup>; C. Daniel Mullins, PhD<sup>2</sup>; Deborah M. Stein,  
11 MD, MPH<sup>1</sup>; Theodore T. Manson, MD<sup>1</sup>; Herman Johal, MD, MPH, FRCSC<sup>3</sup>; Renan Castillo,  
12 PhD<sup>4</sup>; Robert V. O'Toole MD<sup>1</sup>; Gerard P. Slobogean, MD, MPH, FRCSC<sup>1</sup>  
13  
14  
15  
16  
17  
18  
19

- 20 1. University of Maryland School of Medicine, Baltimore, Maryland
- 21 2. University of Maryland School of Pharmacy, Baltimore, Maryland
- 22 3. McMaster University, Hamilton, Ontario
- 23 4. Johns Hopkins Bloomberg School of Public Health, Baltimore, Maryland
- 24
- 25
- 26
- 27
- 28
- 29
- 30
- 31

32 **Corresponding Author:**  
33

34 Gerard P. Slobogean, MD, MPH, FRCSC  
35

36 R Adams Cowley Shock Trauma Center  
37

38 Department of Orthopaedics  
39

40 University of Maryland School of Medicine  
41

42 Suite 300, 110 S. Paca Street  
43

44 Baltimore, MD 21201 USA  
45

46 E-mail: gslobogean@umoa.umm.edu  
47

48 Phone: +1-410-328-6280  
49

50 Fax: +1-410-328-2893  
51  
52  
53  
54  
55  
56  
57  
58  
59  
60

## Abstract

**Objective:** Limited evidence for the optimal venous thromboembolism (VTE) prophylaxis regimen in orthopaedic trauma leads to variability in regimens. We sought to delineate patient preferences towards cost, complication profile, and administration route.

**Design:** Discrete choice experiment (DCE).

**Setting:** Level 1 trauma center in Baltimore, USA.

**Participants:** 232 patients with pelvic or acetabular fractures or operative extremity fractures.

**Primary and secondary outcome measures:** Relative preferences and trade-off estimates for a 1% reduction in complications were estimated using multinomial logit modelling. Interaction terms were added to the model to assess heterogeneity in preferences.

**Results:** Patients preferred oral pills over subcutaneous injections (marginal utility, 0.16; 95% CI: 0.11 - 0.21,  $P < .0001$ ). Preferences changed in favor of injections with an absolute risk reduction of 6.98% in bleeding, 4.53% in wound complications requiring reoperation, 1.27% in VTE, and 0.07% in death from pulmonary embolism (PE). Patient characteristics (sex, race, type of injury, time since injury) affected patient preferences ( $P < .01$ ).

**Conclusions:** Patients preferred oral prophylaxis and were most concerned about risk of death from PE. Furthermore, the findings estimated the trade-offs acceptable to patients and heterogeneity in preferences for VTE prophylaxis.

**Strengths and limitations of this study:**

- This study quantifies patient preferences for venous thromboembolism prophylaxis in a high risk, and often difficult to research, population.
- The results provide valuable benefit-risk tradeoffs estimates to guide clinicians in a common decisional dilemma.
- High face validity in the choice sets is demonstrated by the directionality, magnitude, and consistency of the responses.
- The high response rate captured in this prospective study reduces response bias present in other survey methods.
- The choice sets presented to respondents were hypothetical scenarios, and the respondent's actual choices may be different.

1  
2  
3 **Manuscript Text** (Word Count: 2073)  
4  
5

6 **Introduction**  
7

8  
9  
10 Traumatic injury is a well-described risk factor for the development of venous thromboembolism  
11 (VTE). The incidence of VTE among trauma patients ranges from 20 to 90% without any  
12 preventative measure.<sup>1</sup> In addition, pulmonary embolism (PE) is the third most common cause of  
13 death in patients who survive the first 24 hours following injury.<sup>1-4</sup> Orthopaedic trauma patients  
14 in particular have several well-known risk factors for VTE placing them at exceptionally high  
15 risk.<sup>2, 5-8</sup> Fortunately, chemoprophylaxis has been shown to significantly reduce the incidence of  
16 VTE in this population.<sup>9</sup> However controversy exists as to the optimal VTE prophylaxis regimen  
17 in orthopaedic trauma patients.<sup>10-15</sup>  
18  
19

20  
21 For many orthopaedic populations, the American College of Chest Physicians and the Eastern  
22 Association for the Surgery of Trauma recommend Enoxaparin (low molecular weight heparin  
23 (LMWH)) by subcutaneous injection for VTE prophylaxis, but recent studies show that oral  
24 acetylsalicylic acid (ASA) may be an equally effective alternative with lower risk of bleeding  
25 complications.<sup>10-15</sup> However, only limited data is available specific to orthopaedic trauma  
26 patients who may have even higher risk for both VTE events and bleeding.<sup>16</sup> The Orthopaedic  
27 Trauma Association Evidence Based Quality Value and Safety Committee highlights variability  
28 in prescribed regimens due to the poor scientific support for various regimens and emphasizes  
29 the need for guidelines to improve patient care.<sup>17</sup>  
30  
31

32  
33 The CHEST guidelines emphasize the need for systematic reviews of patient values and  
34 preferences when creating guidelines for specific populations.<sup>18</sup> Creation of guidelines requires  
35 making risk and benefit trade-offs, and patient values regarding VTE prophylaxis depend on the  
36  
37  
38  
39  
40  
41  
42  
43  
44  
45  
46  
47  
48  
49  
50  
51  
52  
53  
54  
55  
56  
57  
58  
59  
60

1  
2  
3 health outcomes considered. Furthermore, defining the heterogeneity of preferences in this  
4  
5 patient population is necessary to provide valuable individualized VTE prevention options.  
6  
7  
8 Implementing guidelines that consider patient preferences may increase patient satisfaction with  
9  
10 and improve adherence to clinical treatments.<sup>28</sup> Patient medication refusal is a leading cause of  
11  
12 non-administration of VTE prophylaxis in inpatients, and missed doses are highly associated  
13  
14 with increased VTE incidence.<sup>19-21</sup> In a study of medical and surgical patient preferences for  
15  
16 VTE prophylaxis regimens, the majority of patients preferred oral administration over  
17  
18 subcutaneous injection if all other factors were equal.<sup>22</sup> Patients who preferred subcutaneous  
19  
20 administration presumed a faster onset of action and were less likely to refuse administration.  
21  
22  
23 Existing VTE prevention studies do not evaluate patient preferences, investigate acceptable  
24  
25 trade-offs of the risks and benefits of those medications, or determine heterogeneity in  
26  
27 preferences based on demographic and clinical characteristics. The purpose of this study was to  
28  
29 elicit the preferences of orthopaedic trauma patients towards currently available VTE  
30  
31 prophylaxis, examine acceptable tradeoffs of the potential complications related to those  
32  
33 medications, and determine heterogeneity in preferences among patient subgroups.  
34  
35  
36  
37  
38  
39  
40  
41  
42  
43

## 44 **Methods**

45  
46 A discrete choice experiment (DCE) was prospectively administered to orthopaedic trauma  
47  
48 patients at a level-1 trauma center. DCEs are a quantitative technique used to measure individual  
49  
50 preferences in a variety of health care settings by administering surveys that ask individuals to  
51  
52 choose the best option between two or more hypothetical scenarios, or choice sets.<sup>23-24,29</sup> Options  
53  
54 are described with a fixed set of attributes levels that vary in each scenario. The data collected  
55  
56  
57  
58  
59  
60

1  
2  
3 can be used to assess the relative importance of each attribute and acceptable trade-offs among  
4  
5 attributes. Monetary costs can be included to produce willingness-to-pay estimates.  
6  
7  
8  
9

### 10 11 *Study setting and population*

12  
13  
14  
15 This study was conducted at the R Adams Cowley Shock Trauma Center in Baltimore, Maryland  
16  
17 and received prior approval by the Institutional Review Board at the University of Maryland  
18  
19 School of Medicine. All adult ( $\geq 18$  years) patients treated with pelvic or acetabular fractures or  
20  
21 an operative extremity fracture were assessed for eligibility from November 2015 through  
22  
23 February 2016. Patients who were unable to consent due to intubation or altered mental status  
24  
25 and non-English speaking patients were excluded. Upon written consent, patients were enrolled  
26  
27 in the study as inpatients or at an outpatient follow-up appointment within 4 months from their  
28  
29 initial admission for their injury.  
30  
31  
32  
33  
34  
35  
36  
37

### 38 *Study design*

39  
40  
41 The attributes and their corresponding levels were selected based on a literature review, patient  
42  
43 interviews, expert consultation, and a retrospective review of patient outcomes. Medication  
44  
45 attributes used in the DCE included medication administration route (oral pill vs. needle  
46  
47 injection), cost, possible side effects including bruising and stomach pain, risk of having a  
48  
49 bleeding complication that requires a blood transfusion, risk of having a wound complication that  
50  
51 requires another operation, risk of VTE requiring therapeutic anticoagulation for 6 months, and  
52  
53 risk of death due to PE. These attributes were chosen to reflect medication qualities that patients  
54  
55  
56  
57  
58  
59  
60

1  
2  
3 are aware of when taking medications (route, cost, side effects) and clinically-important  
4  
5  
6 outcomes.

7  
8  
9 Forty choice sets were developed using a Bayesian D-optimal design with JMP Version 12  
10  
11 software (SAS Institute, Cary, NC) to ensure maximum variation in attribute comparison. The 40  
12  
13 choice sets were then randomly divided into four surveys, each with 10 choice sets, to minimize  
14  
15 respondent burden. As documented by Sandor et al,<sup>30</sup> using heterogeneous designs produce  
16  
17 substantial improvements in efficiency over a single survey and provides more precision in  
18  
19 estimating true parameters. Each choice set compared two hypothetical VTE prophylaxis  
20  
21 medications described by their attributes (**Figure 1**). Patients were randomly administered one of  
22  
23 the four surveys. Demographic data including age, sex, race (as defined by the participant), type  
24  
25 of injury, Injury Severity Score, American Society of Anesthesiologists (ASA) physical status,  
26  
27 income, health insurance status, days on prophylaxis, and timing of recruitment (inpatient vs.  
28  
29 outpatient) was collected from both the survey and the medical record.  
30  
31  
32  
33  
34  
35  
36  
37  
38

### 39 *Data Analysis*

40  
41  
42 Data collected through the DCE survey allows the quantification of and statistical inference  
43  
44 about the relative importance of VTE prophylaxis medication attributes. A multinomial logit  
45  
46 model, with effects coding, was used to estimate patient preferences using marginal utility,  
47  
48 willingness-to-pay, and acceptable trade-off estimates for a 1% reduction in VTE complications  
49  
50 or side effects. Marginal utility is a measure of patient preference, with the estimate signifying  
51  
52 the strength and direction of one's preference towards the attribute. With this analysis, we are  
53  
54 able to determine the relative magnitude of patient preferences to avoid VTE-related  
55  
56  
57  
58  
59  
60



1  
2  
3 complications in association with their medication choice. Preference heterogeneity was  
4  
5 subsequently assessed by adding an interaction term into the model with a priori determined  
6  
7 variables of interest (e.g. age, sex, or race). All data analysis was conducted using the Choice  
8  
9 Modeling platform in JMP Version 12.  
10  
11

## 12 13 14 15 16 17 **Results**

18  
19  
20 Of the 310 patients screened for participation, 50 were ineligible (40 unable to consent due to  
21  
22 altered mental status, 8 non-English speaking, 2 contraindicated for VTE prophylaxis) and 28  
23  
24 (11%) patients refused participation. Of the 232 patients included in the analysis, the mean age  
25  
26 was 47.9 years, with 56.9% male, and 66.8% were white. The majority of participants had a  
27  
28 lower extremity injury (83.6%), with a mean injury severity score of 11.7 (SD, 6.7), and were  
29  
30 fully insured (83.1%) (**Table 1**).  
31  
32

33  
34  
35 Patients most strongly preferred a reduction in risk of death by PE (marginal utility, 4.57;  
36  
37  $P < .0001$ ), distantly followed by a reduction in the risk of VTE requiring therapeutic  
38  
39 anticoagulation, wound complications requiring another surgery, and bleeding complications  
40  
41 requiring a transfusion (**Table 2**). Patients were willing to pay \$1686.90 for a 1% reduction in  
42  
43 risk of death due to PE compared to \$92.29 or less for a 1% reduction in any of the other  
44  
45 measured outcome variables. Patients also preferred to take oral pills (marginal utility, 0.16;  
46  
47  $P < .0001$ ) and were willing to pay \$117.45 to receive prophylaxis via oral route over  
48  
49 subcutaneous injection. Possible medication side effects, such as stomach pain and bruising, did  
50  
51 not significantly influence patient preferences ( $P > .1$ ).  
52  
53  
54  
55  
56  
57  
58  
59  
60

1  
2  
3 To change patient preference in favor of injections requires a 6.98% absolute reduction in the  
4 risk of bleeding complications requiring transfusion, a 4.53% absolute reduction in the risk of  
5 wound complications requiring reoperation, and a 1.27% absolute reduction in risk of VTE  
6 requiring therapeutic anticoagulation (**Table 3**). In contrast, only a 0.07% absolute reduction in  
7 risk of death due to PE was needed to change patient preference.  
8  
9

10  
11  
12  
13  
14  
15  
16 In our subgroup analyses examining heterogeneity in preferences, patients who were female,  
17 white, or had lower extremity injuries demonstrated significantly stronger preference for oral  
18 VTE prophylaxis over subcutaneous injections ( $P<.05$ ) (**Table 4**). Patients with upper extremity  
19 injuries valued a reduction in risk of bleeding complications more than patients with lower  
20 extremity injuries ( $P=.01$ ). Patients who were recruited as an inpatient valued a reduction in risk  
21 of wound complications requiring reoperation more than patients who were recruited from the  
22 outpatient clinic ( $P<.01$ ).  
23  
24  
25  
26  
27  
28  
29  
30  
31  
32  
33  
34  
35  
36

### 37 **Discussion**

38  
39 Consistent with previous studies,<sup>22</sup> our study demonstrates a strong patient preference for oral  
40 VTE prophylaxis over subcutaneous injection when all other relevant attributes are equal.  
41  
42

43  
44 However, patients only required a small reduction in the absolute risk of death due to PE to  
45 change their preference in favor of an injection. When choosing between VTE prophylaxis  
46 regimens, patients most valued (in order): risk of death due to PE, risk of VTE requiring  
47 therapeutic anticoagulation, risk of wound complications requiring reoperation, and risk of  
48 bleeding complications requiring transfusion. A defined reduction in any of these outcomes  
49 could change patient preference to favor the injection route. In addition, underlying patient  
50  
51  
52  
53  
54  
55  
56  
57  
58  
59  
60

1  
2  
3 factors such as sex, race, type of injury, and inpatient status led to significant heterogeneity in  
4  
5 patient preferences.  
6  
7

8  
9 To our knowledge, our study is the first to assess the weight of patient-valued outcomes  
10  
11 regarding potential risks and complications of VTE prophylaxis. The study also determined  
12  
13 patient characteristics associated with heterogeneity in their preferences. Previous studies have  
14  
15 shown that patient refusal is a common reason for missed VTE doses and increases the risk of a  
16  
17 VTE event.<sup>19-22</sup> Patient preference for oral medications is also well-documented.<sup>22,25</sup> Our study  
18  
19 also demonstrates a strong preference for oral medications, but our results show that this  
20  
21 preference can change if the risk of the aforementioned patient-important outcomes is high  
22  
23 enough. Patients were particularly concerned about the risk of death due to PE, requiring only a  
24  
25 0.07% absolute reduction in risk of death to change patient preference in favor of an injection. In  
26  
27 addition, only relatively small reductions in the risk of other outcomes were required to change  
28  
29 patient preference. Furthermore, the preference for route varies significantly depending on the  
30  
31 patient's sex, race, type of injury, and inpatient status.  
32  
33  
34  
35  
36  
37

38 While the design of the DCE enables the assessment of risk-benefits tradeoffs among subgroups,  
39  
40 it does not allow for qualitative analysis of patient preferences. As a result, we are only able to  
41  
42 speculate as to why patients valued certain outcomes more than others. The greater value placed  
43  
44 on risk of death due to PE compared to other outcome measures could be a result of death being  
45  
46 the easiest outcome variable for the average patient to understand. Patients who were recruited as  
47  
48 an inpatient were more concerned about the risk of reoperation than patients recruited as  
49  
50 outpatients, potentially because their injury and initial operation were more recent in their  
51  
52 memory. In addition, study participants had varying lengths of VTE prophylaxis prescribed at  
53  
54 time of recruitment and some patients were closer to time of injury and initial operation than  
55  
56  
57  
58  
59  
60

1  
2  
3 others. Although, when assessed, time since injury did not affect patient preferences. Some  
4  
5 participants had personal experience with one of the measured outcomes while others had no  
6  
7 history of complications, which we were unable to control for in our final analysis. Lastly, we  
8  
9 did not collect data on patient education level which could affect the patient's understanding of  
10  
11 certain outcomes, however income and insurance level may be surrogate markers for education  
12  
13 and were included in the analysis.  
14  
15

16  
17  
18 In the current era of patient-centered healthcare, it is important that we consider all outcomes that  
19  
20 patients' value and the heterogeneity in those preferences when conducting clinical comparative  
21  
22 effectiveness research and when making clinical guidelines in order to improve healthcare  
23  
24 delivery and reduce cost.<sup>26, 27, 28</sup> Our data demonstrate that orthopaedic trauma patients prefer  
25  
26 VTE prophylaxis by oral pill to prophylaxis by subcutaneous injection when all other relevant  
27  
28 attributes are equal. However, the risk of death due to PE is the dominant concern when choosing  
29  
30 a regimen. Our study is the first to document the value patients place on various clinically-  
31  
32 important outcomes related to VTE prophylaxis and to define the underlying patient factors that  
33  
34 contribute to variation in VTE prophylaxis preferences with risk-benefits tradeoffs among  
35  
36 subgroups in this important area of ongoing debate. In the era of patient-centered healthcare,  
37  
38 future studies, and clinical guideline recommendations comparing available VTE prophylaxis  
39  
40 regimens should focus on the outcomes most important to patients and incorporate patient trade-  
41  
42 off estimates to ensure their work is reflective of patient preferences.  
43  
44  
45  
46  
47  
48  
49  
50  
51  
52  
53  
54  
55  
56  
57  
58  
59  
60

**Table 1** Characteristics of orthopaedic fracture participants (n=232)

| <b>Characteristic</b>         | <b>Mean (SD)</b> |
|-------------------------------|------------------|
| Male, No. (%)                 | 132 (56.9)       |
| Age, y                        | 47.9 (17.7)      |
| Race, No. (%)                 |                  |
| White                         | 155 (66.8)       |
| Black                         | 62 (26.7)        |
| Other                         | 8 (3.4)          |
| Hispanic                      | 7 (3.0)          |
| Primary Injury, No. (%)       |                  |
| Lower Extremity               | 194 (83.6)       |
| Upper Extremity               | 38 (16.4)        |
| ASA, No. (%)                  |                  |
| 1                             | 21 (9.1)         |
| 2                             | 117 (50.4)       |
| 3                             | 81 (34.9)        |
| 4                             | 11 (4.7)         |
| Unknown                       | 2 (0.9)          |
| Injury severity score         | 11.7 (6.7)       |
| Income, \$USD, No. (%)        |                  |
| <\$10,000                     | 46 (19.8)        |
| \$10,000 - \$19,999           | 20 (8.6)         |
| \$20,000 - \$34,999           | 35 (15.1)        |
| \$35,000-\$49,999             | 24 (10.3)        |
| \$50,000 - \$74,999           | 26 (11.1)        |
| \$75,000 - \$100,000          | 24 (10.3)        |
| >\$100,000                    | 35 (15.1)        |
| Unknown                       | 22 (9.5)         |
| Health Insurance, No. (%)     |                  |
| Fully Insured                 | 193 (83.1)       |
| Partially Insured             | 12 (5.2)         |
| Uninsured                     | 24 (10.3)        |
| Unknown                       | 3 (1.3)          |
| Timing of recruitment No. (%) |                  |
| In-patient                    | 78 (33.6)        |
| Out-patient                   | 154 (66.4)       |

**Table 2** Patient preferences and valuation of venous thromboembolism prophylaxis attributes

| Attribute                                     | Level             | Marginal Utility | 95% CI        | WTP       | P Value |
|-----------------------------------------------|-------------------|------------------|---------------|-----------|---------|
| Route                                         | Oral pill         | 0.16             | 0.11 - 0.21   | \$117.45  | <.0001  |
|                                               | Injection         | -0.16            | -0.21 – -0.11 | -         | -       |
| Side Effects                                  | Bruising on leg   | -0.04            | -0.11 – 0.02  | -\$45.94  | 0.11    |
|                                               | Stomach pain      | -0.04            | -0.12 – 0.04  | -\$44.08  | -       |
|                                               | No side effects   | 0.08             | 0.003 – 0.16  | \$45.08   | -       |
| Bleeding complications requiring transfusion  | Reduce risk by 1% | 0.05             | 0.04 – 0.05   | \$16.83   | <0.0001 |
| Wound complications requiring another surgery | Reduce risk by 1% | 0.07             | 0.06 – 0.08   | \$25.91   | <0.0001 |
| Blood clot requiring long-term medication     | Reduce risk by 1% | 0.25             | 0.15 – 0.36   | \$92.29   | <0.0001 |
| Death due to PE                               | Reduce risk by 1% | 4.57             | 3.26 – 5.89   | \$1686.90 | <0.0001 |
| Cost                                          | \$10 increase     | -0.03            | -0.04 – -0.02 | Reference | <0.0001 |

PE = pulmonary embolism; CI = confidence interval; WTP = willingness to pay

**Note:** Marginal utility quantifies the additional satisfaction gained by the patient for each described attribute/level. Negative marginal utility values signify an aversion to or dissatisfaction with the described attribute/level.

**Table 3** The absolute risk reduction of a potential complication that a patient would be willing to accept to change their route preference from oral to injection prophylaxis

| <b>Attribute</b>                              | <b>Acceptable Trade-off</b> |
|-----------------------------------------------|-----------------------------|
| Bleeding complications requiring transfusion  | 6.98%                       |
| Wound complications requiring another surgery | 4.53%                       |
| Blood clot requiring long-term medication     | 1.27%                       |
| Death due to PE                               | 0.07%                       |

PE = pulmonary embolism

For peer review only

**Table 4** Sub-group analysis quantifying heterogeneity in patient preferences

| Attribute                                     | Level                         | Sub-Group                 | Marginal Utility | 95% CI         | WTP      | P Value |
|-----------------------------------------------|-------------------------------|---------------------------|------------------|----------------|----------|---------|
| Route                                         | Take oral pill over injection | Sex [Female]              | 0.07             | 0.02 – 0.11    | \$201.24 | <0.01   |
|                                               |                               | Sex [Male]                | -0.07            | -0.11 - -0.02  | \$66.79  |         |
|                                               |                               | Race [White]              | 0.09             | 0.03 – 0.14    | \$182.23 | <0.01   |
|                                               |                               | Race [Black]              | -0.09            | -0.14 - -0.03  | \$18.48  |         |
| Bleeding complications requiring transfusion  | Reduce risk by 1%             | Injury [Lower Extremity]  | 0.08             | 0.02 – 0.15    | \$132.38 | 0.01    |
|                                               |                               | Injury [Upper Extremity]  | -0.08            | -0.15 - -0.02  | \$18.98  |         |
|                                               |                               | Injury [Lower Extremity]  | -0.02            | -0.03 - -0.003 | \$14.50  | 0.01    |
|                                               |                               | Injury [Upper Extremity]  | 0.02             | 0.003 – 0.03   | \$32.04  |         |
| Wound complications requiring another surgery | Reduce risk by 1%             | Recruitment [In-patient]  | 0.02             | 0.003 – 0.03   | \$46.32  | <0.01   |
|                                               |                               | Recruitment [Out-patient] | -0.02            | -0.03 – -0.003 | \$20.24  |         |

CI = confidence interval; WTP = willingness to pay

**Note:** Marginal utility quantifies the additional satisfaction gained by the patient for each described attribute/level. Negative marginal utility values signify an aversion to or dissatisfaction with the described attribute/level.



1  
2  
3 **Figure 1:** Sample question from the discrete choice experiment survey administered to  
4 participants. In each question the values for each hypothetical medication are varied.  
5  
6  
7  
8  
9  
10  
11  
12  
13  
14  
15  
16  
17  
18  
19  
20  
21  
22  
23  
24  
25  
26  
27  
28  
29  
30  
31  
32  
33  
34  
35  
36  
37  
38  
39  
40  
41  
42  
43  
44  
45  
46  
47  
48  
49  
50  
51  
52  
53  
54  
55  
56  
57  
58  
59  
60

For peer review only

## Acknowledgments

The authors thank all of the respondents for their time and participation in the study.

## Author Contribution

BH contributed to the literature search, study design, data collection, data interpretation, writing, and critical revision. NNO contributed to the literature search, study design, data analysis, data interpretation, writing, and critical revision. CDM contributed to the data interpretation and critical revision. DS, TTM, HJ, RVO, and GPS contributed to the literature search, study design, data interpretation, and critical revision. RC contributed to the study design, data analysis, data interpretation, and critical revision. All authors have approved the final version of the article submitted and agree to be accountable for all aspects of the work.

## Funding

This study was supported by a grant from the Patient-Centered Outcomes Research Institute (PCS-1511-32745).

## Competing interests

All authors have completed the ICMJE uniform disclosure form at [www.icmje.org/coi\\_disclosure.pdf](http://www.icmje.org/coi_disclosure.pdf) and declare: no support from any organisation for the submitted work; no financial relationships with any organisations that might have an interest in

1  
2  
3 the submitted work in the previous three years other than those listed below; no other  
4  
5 relationships or activities that could appear to have influenced the submitted work apart from the  
6  
7 following:  
8  
9

10  
11 Dr. Mullins reports consulting with Bayer, Daiichi Sankyo, Janssen/J&J, Mundipharma, Novo  
12  
13 Nordisk, and Pfizer and receiving grants from Bayer, Novartis, Merck, and Pfizer. Dr. Stein  
14  
15 reports receiving grants from the US Air Force and serves as an advisor for Decisio Health, Inc.  
16  
17 Dr. Manson reports consulting with Stryker, Globus, and Smith & Nephew, being paid for expert  
18  
19 testimony from various law firms, and payment for lectures by the Maine Review Course. Dr.  
20  
21 O'Toole reports consulting with Coorstek (Zimmer) and Smith & Nephew and receiving  
22  
23 royalties from Coorstek. Dr. Slobogean reports payments for presenting by Zimmer Biomet. No  
24  
25 other disclosures were reported.  
26  
27  
28  
29  
30  
31  
32  
33

#### 34 **Data sharing statement**

35  
36  
37 No additional data are available.  
38  
39  
40  
41  
42  
43  
44  
45  
46  
47  
48  
49  
50  
51  
52  
53  
54  
55  
56  
57  
58  
59  
60

## References

1. Shackford SR, Moser KM. Deep venous thrombosis and pulmonary embolism in trauma patients. *J Intensive Care Med.* 1988; 3(2):87-98.
2. Geerts WH, Code KI, Jay RM, et al. A prospective study of venous thromboembolism after major trauma. *N Engl J Med.* 1994;331(24):1601–1606.
3. O'Malley KF, Ross SE. Pulmonary embolism in major trauma patients. *J Trauma.* 1990;30(6):748–750.
4. Sevitt S, Gallagher N. Venous thrombosis and pulmonary embolism. A clinico-pathological study in injured and burned patients. *Br J Surg.* 1961;48:475–489.
5. Shackford SR, Davis JW, Hollingsworth-Fridlund P, et al. Venous thromboembolism in patients with major trauma. *Am J Surg.* 1990;159(4):365–369.
6. Abelseth G, Buckley RE, Pineo GE, et al. Incidence of deep-vein thrombosis in patients with fractures of the lower extremity distal to the hip. *J Orthop Trauma.* 1996;10(4):230–235.
7. Rogers FB. Venous thromboembolism in trauma patients: a review. *Surgery.* 2001;130(1):1–12.
8. Hak DJ. Prevention of venous thromboembolism in trauma and long bone fractures. *Curr Opin Pulm Med.* 2001;7(5):338–343.
9. Sannard JP, Lopez-Ben RR, Volgas DA, et al. Prophylaxis against deep-vein thrombosis following trauma: a prospective, randomized comparison of mechanical and

- 1  
2  
3 pharmacologic prophylaxis. *J Bone Joint Surg Am.* 2006;88(2):261-266.  
4  
5  
6  
7 10. Falck-Ytter Y, Francis CW, Johanson NA, et al. Prevention of VTE in orthopaedic  
8 surgery patients: Antithrombotic Therapy and Prevention of Thrombosis, 9th ed:  
9 American College of Chest Physicians Evidence-Based Clinical Practice Guidelines.  
10  
11 *Chest.* 2012;141(2 Suppl):e278S–325S.  
12  
13  
14  
15  
16  
17 11. Hill J, Treasure T, National Clinical Guideline Centre for Acute and Chronic Conditions.  
18 Reducing the risk of venous thromboembolism in patients admitted to hospital: summary  
19 of NICE guidance. *BMJ.* 2010;340:c95.  
20  
21  
22  
23  
24  
25  
26 12. Mont MA, Jacobs JJ. Preventing venous thromboembolic disease in patients undergoing  
27 elective hip and knee arthroplasty. *J Am Acad Orthop Surg.* 2011;19(12):768–776.  
28  
29  
30  
31 13. Anderson DR, Dunbar MJ, Bohm ER, et al. Aspirin versus low-molecular-weight heparin  
32 for extended venous thromboembolism prophylaxis after total hip arthroplasty: a  
33 randomized trial. *Ann Intern Med.* 2013;158(11):800-806.  
34  
35  
36  
37  
38  
39 14. Sahebally SM, Healy D, Walsh SR. Aspirin in the primary prophylaxis of venous  
40 thromboembolism in surgical patients. *Surgeon.* 2015;13(6):348-58.  
41  
42  
43  
44  
45 15. Drescher FS, Sirovich BE, Lee A, et al. Aspirin versus anticoagulation for prevention of  
46 venous thromboembolism major lower extremity orthopedic surgery: a systematic review  
47 and meta-analysis. *J Hosp Med.* 2014; 9(9):579-585.  
48  
49  
50  
51  
52  
53 16. Barrera LM, Perel P, Ker K, et al. Thromboprophylaxis for trauma patients. *Cochrane*  
54  
55 *Database Syst Rev.* 2013;3:CD008303.  
56  
57  
58  
59  
60

- 1  
2  
3  
4  
5  
6  
7  
8  
9  
10  
11  
12  
13  
14  
15  
16  
17  
18  
19  
20  
21  
22  
23  
24  
25  
26  
27  
28  
29  
30  
31  
32  
33  
34  
35  
36  
37  
38  
39  
40  
41  
42  
43  
44  
45  
46  
47  
48  
49  
50  
51  
52  
53  
54  
55  
56  
57  
58  
59  
60
17. Sagi HC, Ahn J, Ciesla D, et al. Venous Thromboembolism Prophylaxis in Orthopaedic Trauma Patients: A Survey of OTA Member Practice Patterns and OTA Expert Panel Recommendations. *J Orthop Trauma*. 2015;29(10):e355-62.
  18. MacLean S, Mulla S, Akl EA, et al. Patient values and preferences in decision making for antithrombotic therapy: a systematic review. American College of Chest Physicians evidenced-based clinical practice guidelines. Antithrombotic Therapy and Prevention of Thrombosis, 9<sup>th</sup> ed. *Chest*. 2012;141(2 Suppl):e1S-23S.
  19. Shermock KM, Lau BD, Haut ER, et al. Patterns of non-administration of ordered doses of venous thromboembolism prophylaxis: implications for novel intervention strategies. *PLoS One*. 2013;8(6):e66311.
  20. Haut ET, Lau BD, Kraus PS, et al. Preventability of Hospital-Acquired Venous Thromboembolism. *JAMA Surg*. 2015;150(9):912-915.
  21. Louis SG, Sato M, Geraci T, et al. Correlation of missed doses of enoxaparin with increased incidence of deep vein thrombosis in trauma and general surgery patients. *JAMA Surg*. 2014;149(4):365-370.
  22. Wong A, Kraus PS, Lau BD, et al. Patient preferences regarding pharmacologic venous thromboembolism prophylaxis. *J Hosp Med*. 2015;10(2):108-111.
  23. Bridges JF, Hauber AB, Marshall D, et al. Conjoint analysis applications in health—a checklist: a report of the ISPOR Good Research Practices for Conjoint Analysis Task Force. *Value Health*. 2011;14(4):403-413.

- 1  
2  
3  
4  
5  
6  
7  
8  
9  
10  
11  
12  
13  
14  
15  
16  
17  
18  
19  
20  
21  
22  
23  
24  
25  
26  
27  
28  
29  
30  
31  
32  
33  
34  
35  
36  
37  
38  
39  
40  
41  
42  
43  
44  
45  
46  
47  
48  
49  
50  
51  
52  
53  
54  
55  
56  
57  
58  
59  
60
24. Luyten J, Kessels R, Goos P, et al. Public preferences for prioritizing preventative and curative health care interventions: a discrete choice experiment. *Value Health*. 2015;18(2):224-233.
25. Jin J, Sklar GE, Min Sen Oh V, et al. Factors affecting therapeutic compliance: a review from the patient's perspective. *Ther Clin Risk Manag*. 2008;4(1):269-286.
26. Tunis SR, Clarke M, Gorst SL, et al. Improving the relevance and consistency of outcomes in comparative effectiveness research. *J Comp Eff Res*. 2016;5(2):193-205.
27. Price-Haywood EG. Clinical comparative effectiveness research through the lens of healthcare decisionmakers. *Ochsner J*. 2015;15(2):154-161.
28. Krahn M, Naglie G. The next step in guideline development: incorporating patient preferences. *JAMA*. 2008;300(4):436-438.
29. Ryan M, Farrar S. Using conjoint analysis to elicit preferences for health care. *BMJ*. 2000;320(7248):1530-1533.
30. Sándor Z, Wedel M. Heterogeneous conjoint choice designs. *J Market Res*. 2001;42(2):210-218.

1  
2  
3  
4  
5  
6  
7  
8  
9  
10  
11  
12  
13  
14  
15  
16  
17  
18  
19  
20  
21  
22  
23  
24  
25  
26  
27  
28  
29  
30  
31  
32  
33  
34  
35  
36  
37  
38  
39  
40  
41  
42  
43  
44  
45  
46  
47  
48  
49  
50  
51  
52  
53  
54  
55  
56  
57  
58  
59  
60

Which medication would you prefer?

|                                                                                               | Medication A                                                                                         | Medication B                                                                                           |
|-----------------------------------------------------------------------------------------------|------------------------------------------------------------------------------------------------------|--------------------------------------------------------------------------------------------------------|
| Type of daily medication                                                                      | Oral pill                                                                                            | Needle injection                                                                                       |
| What will it cost you                                                                         | \$100                                                                                                | \$50                                                                                                   |
| Possible side effect                                                                          | None                                                                                                 | Bruising on leg                                                                                        |
| Chance that you will have a bleeding complication and need a blood transfusion                | 10 out of 1000<br>  | 100 out of 1000<br> |
| Chance that you will have wound complication and need another operation                       | 50 out of 1000<br>  | 100 out of 1000<br> |
| Chance that you will have a blood clot and have to take medications for 6 months              | 20 out of 1000<br> | 10 out of 1000<br> |
| Chance of death due to a pulmonary embolism                                                   | 1 out of 1000<br> | 1 out of 1000<br> |
| Check one  | Prefer Medication A<br><input type="checkbox"/>                                                      | Prefer Medication B<br><input type="checkbox"/>                                                        |

Figure 1. Sample question from the discrete choice experiment survey administered to participants. In each question the values for each hypothetical medication are varied.

172x209mm (300 x 300 DPI)



STROBE Statement—Checklist of items that should be included in reports of *cross-sectional studies*

|                              | Item No | Recommendation                                                                                                                                                                                                                                                                                                                                                                                                     |
|------------------------------|---------|--------------------------------------------------------------------------------------------------------------------------------------------------------------------------------------------------------------------------------------------------------------------------------------------------------------------------------------------------------------------------------------------------------------------|
| <b>Title and abstract</b>    | 1       | (a) Indicate the study's design with a commonly used term in the title or the abstract<br><b>Page 1</b>                                                                                                                                                                                                                                                                                                            |
|                              |         | (b) Provide in the abstract an informative and balanced summary of what was done and what was found <b>Page 2</b>                                                                                                                                                                                                                                                                                                  |
| <b>Introduction</b>          |         |                                                                                                                                                                                                                                                                                                                                                                                                                    |
| Background/rationale         | 2       | Explain the scientific background and rationale for the investigation being reported<br><b>Page 4-5</b>                                                                                                                                                                                                                                                                                                            |
| Objectives                   | 3       | State specific objectives, including any prespecified hypotheses <b>Page 5</b>                                                                                                                                                                                                                                                                                                                                     |
| <b>Methods</b>               |         |                                                                                                                                                                                                                                                                                                                                                                                                                    |
| Study design                 | 4       | Present key elements of study design early in the paper <b>Page 5-6</b>                                                                                                                                                                                                                                                                                                                                            |
| Setting                      | 5       | Describe the setting, locations, and relevant dates, including periods of recruitment, exposure, follow-up, and data collection <b>Page 6</b>                                                                                                                                                                                                                                                                      |
| Participants                 | 6       | (a) Give the eligibility criteria, and the sources and methods of selection of participants <b>Page 6</b>                                                                                                                                                                                                                                                                                                          |
| Variables                    | 7       | Clearly define all outcomes, exposures, predictors, potential confounders, and effect modifiers. Give diagnostic criteria, if applicable <b>Page 6-7</b>                                                                                                                                                                                                                                                           |
| Data sources/<br>measurement | 8*      | For each variable of interest, give sources of data and details of methods of assessment (measurement). Describe comparability of assessment methods if there is more than one group <b>Page 7</b>                                                                                                                                                                                                                 |
| Bias                         | 9       | Describe any efforts to address potential sources of bias <b>Page 7-8</b>                                                                                                                                                                                                                                                                                                                                          |
| Study size                   | 10      | Explain how the study size was arrived at <b>Page 7</b>                                                                                                                                                                                                                                                                                                                                                            |
| Quantitative variables       | 11      | Explain how quantitative variables were handled in the analyses. If applicable, describe which groupings were chosen and why                                                                                                                                                                                                                                                                                       |
| Statistical methods          | 12      | (a) Describe all statistical methods, including those used to control for confounding<br><b>Page 7-8</b><br>(b) Describe any methods used to examine subgroups and interactions <b>Page 7-8</b><br>(c) Explain how missing data were addressed <b>Page 7-8</b><br>(d) If applicable, describe analytical methods taking account of sampling strategy<br>(e) Describe any sensitivity analyses <b>Page 7-8</b>      |
| <b>Results</b>               |         |                                                                                                                                                                                                                                                                                                                                                                                                                    |
| Participants                 | 13*     | (a) Report numbers of individuals at each stage of study—eg numbers potentially eligible, examined for eligibility, confirmed eligible, included in the study, completing follow-up, and analysed <b>Page 8</b><br>(b) Give reasons for non-participation at each stage <b>Page 8</b><br>(c) Consider use of a flow diagram                                                                                        |
| Descriptive data             | 14*     | (a) Give characteristics of study participants (eg demographic, clinical, social) and information on exposures and potential confounders <b>Page 8</b><br>(b) Indicate number of participants with missing data for each variable of interest                                                                                                                                                                      |
| Outcome data                 | 15*     | Report numbers of outcome events or summary measures <b>Page 8</b>                                                                                                                                                                                                                                                                                                                                                 |
| Main results                 | 16      | (a) Give unadjusted estimates and, if applicable, confounder-adjusted estimates and their precision (eg, 95% confidence interval). Make clear which confounders were adjusted for and why they were included <b>Page 9</b><br>(b) Report category boundaries when continuous variables were categorized <b>Page 9</b><br>(c) If relevant, consider translating estimates of relative risk into absolute risk for a |

|                          |    |                                                                                                                                                                                           |
|--------------------------|----|-------------------------------------------------------------------------------------------------------------------------------------------------------------------------------------------|
|                          |    | meaningful time period                                                                                                                                                                    |
| Other analyses           | 17 | Report other analyses done—eg analyses of subgroups and interactions, and sensitivity analyses <b>Page 9</b>                                                                              |
| <b>Discussion</b>        |    |                                                                                                                                                                                           |
| Key results              | 18 | Summarise key results with reference to study objectives <b>Page 9</b>                                                                                                                    |
| Limitations              | 19 | Discuss limitations of the study, taking into account sources of potential bias or imprecision. Discuss both direction and magnitude of any potential bias <b>Page 10-11</b>              |
| Interpretation           | 20 | Give a cautious overall interpretation of results considering objectives, limitations, multiplicity of analyses, results from similar studies, and other relevant evidence <b>Page 11</b> |
| Generalisability         | 21 | Discuss the generalisability (external validity) of the study results <b>Page 10</b>                                                                                                      |
| <b>Other information</b> |    |                                                                                                                                                                                           |
| Funding                  | 22 | Give the source of funding and the role of the funders for the present study and, if applicable, for the original study on which the present article is based <b>Page 17</b>              |

\*Give information separately for exposed and unexposed groups.

**Note:** An Explanation and Elaboration article discusses each checklist item and gives methodological background and published examples of transparent reporting. The STROBE checklist is best used in conjunction with this article (freely available on the Web sites of PLoS Medicine at <http://www.plosmedicine.org/>, Annals of Internal Medicine at <http://www.annals.org/>, and Epidemiology at <http://www.epidem.com/>). Information on the STROBE Initiative is available at [www.strobe-statement.org](http://www.strobe-statement.org).

# BMJ Open

## Patient Preferences for Venous Thromboembolism Prophylaxis After Injury: A Discrete Choice Experiment

|                                 |                                                                                                                                                                                                                                                                                                                                                                                                                                                                                                                                                                                                                                                                    |
|---------------------------------|--------------------------------------------------------------------------------------------------------------------------------------------------------------------------------------------------------------------------------------------------------------------------------------------------------------------------------------------------------------------------------------------------------------------------------------------------------------------------------------------------------------------------------------------------------------------------------------------------------------------------------------------------------------------|
| Journal:                        | <i>BMJ Open</i>                                                                                                                                                                                                                                                                                                                                                                                                                                                                                                                                                                                                                                                    |
| Manuscript ID                   | bmjopen-2017-016676.R1                                                                                                                                                                                                                                                                                                                                                                                                                                                                                                                                                                                                                                             |
| Article Type:                   | Research                                                                                                                                                                                                                                                                                                                                                                                                                                                                                                                                                                                                                                                           |
| Date Submitted by the Author:   | 17-Apr-2017                                                                                                                                                                                                                                                                                                                                                                                                                                                                                                                                                                                                                                                        |
| Complete List of Authors:       | Haac, Bryce; University of Maryland School of Medicine, General Surgery<br>O'Hara, Nathan; University of Maryland School of Medicine, Orthopaedics<br>Mullins, C; University of Maryland School of Pharmacy<br>Stein, DM; R Adams Cowley Shock Trauma Center, University of Maryland School of Medicine<br>Manson, Theodore; University of Maryland School of Medicine, Orthopaedics<br>Johal , Herman; McMaster University,<br>Castillo, Renan; Johns Hopkins University Bloomberg School of Public Health<br>O'Toole, Robert; University of Maryland School of Medicine, Orthopaedics<br>Slobogean, GP ; University of Maryland School of Medicine, Orthopaedics |
| <b>Primary Subject Heading</b>: | Patient-centred medicine                                                                                                                                                                                                                                                                                                                                                                                                                                                                                                                                                                                                                                           |
| Secondary Subject Heading:      | Haematology (incl blood transfusion), Health economics, Surgery                                                                                                                                                                                                                                                                                                                                                                                                                                                                                                                                                                                                    |
| Keywords:                       | Thromboembolism < CARDIOLOGY, Anticoagulation < HAEMATOLOGY, Trauma management < ORTHOPAEDIC & TRAUMA SURGERY, Adult surgery < SURGERY, Orthopaedic & trauma surgery < SURGERY                                                                                                                                                                                                                                                                                                                                                                                                                                                                                     |
|                                 |                                                                                                                                                                                                                                                                                                                                                                                                                                                                                                                                                                                                                                                                    |

SCHOLARONE™  
Manuscripts

1  
2  
3 **Patient Preferences for Venous Thromboembolism Prophylaxis After Injury: A Discrete**  
4  
5 **Choice Experiment**  
6  
7

8  
9  
10 Bryce E. Haac, MD<sup>1</sup>; Nathan N. O'Hara, MHA<sup>1</sup>; C. Daniel Mullins, PhD<sup>2</sup>; Deborah M. Stein,  
11 MD, MPH<sup>1</sup>; Theodore T. Manson, MD<sup>1</sup>; Herman Johal, MD, MPH, FRCSC<sup>3</sup>; Renan Castillo,  
12 PhD<sup>4</sup>; Robert V. O'Toole MD<sup>1</sup>; Gerard P. Slobogean, MD, MPH, FRCSC<sup>1</sup>  
13  
14  
15  
16  
17

- 18  
19  
20 1. University of Maryland School of Medicine, Baltimore, Maryland  
21  
22 2. University of Maryland School of Pharmacy, Baltimore, Maryland  
23  
24 3. McMaster University, Hamilton, Ontario  
25  
26 4. Johns Hopkins Bloomberg School of Public Health, Baltimore, Maryland  
27  
28  
29  
30  
31

32 **Corresponding Author:**  
33

34 Gerard P. Slobogean, MD MPH FRCSC  
35

36 Department of Orthopaedics  
37

38 University of Maryland School of Medicine  
39

40 Suite 300, 110 S. Paca Street  
41

42 Baltimore, MD 21201 USA  
43

44 E-mail: gslobogean@umoa.umm.edu  
45

46 Phone: +1-410-328-6280  
47

48 Fax: +1-410-328-2893  
49  
50  
51  
52  
53  
54  
55  
56  
57  
58  
59  
60

## Abstract

**Objective:** Limited evidence for the optimal venous thromboembolism (VTE) prophylaxis regimen in orthopaedic trauma leads to variability in regimens. We sought to delineate patient preferences towards cost, complication profile, and administration route (oral tablet vs. subcutaneous injection).

**Design:** Discrete choice experiment (DCE).

**Setting:** Level 1 trauma center in Baltimore, USA.

**Participants:** 232 adult trauma patients (mean age 47.9 years) with pelvic or acetabular fractures or operative extremity fractures.

**Primary and secondary outcome measures:** Relative preferences and trade-off estimates for a 1% reduction in complications were estimated using multinomial logit modelling. Interaction terms were added to the model to assess heterogeneity in preferences.

**Results:** Patients preferred oral tablets over subcutaneous injections (marginal utility, 0.16; 95% CI: 0.11 - 0.21,  $P < 0.0001$ ). Preferences changed in favor of injections with an absolute risk reduction of 6.98% in bleeding, 4.53% in wound complications requiring reoperation, 1.27% in VTE, and 0.07% in death from pulmonary embolism (PE). Patient characteristics (sex, race, type of injury, time since injury) affected patient preferences ( $P < 0.01$ ).

**Conclusions:** Patients preferred oral prophylaxis and were most concerned about risk of death from PE. Furthermore, the findings estimated the trade-offs acceptable to patients and heterogeneity in preferences for VTE prophylaxis.

**Strengths and limitations of this study:**

- This study quantifies patient preferences for venous thromboembolism prophylaxis in a high risk, and often difficult to research, population.
- The results provide valuable benefit-risk tradeoffs estimates to guide clinicians in a common decisional dilemma.
- High face validity in the choice sets is demonstrated by the directionality, magnitude, and consistency of the responses.
- The high response rate captured in this prospective study reduces response bias present in other survey methods.
- The choice sets presented to respondents were hypothetical scenarios, and the respondent's actual choices may be different.

1  
2  
3 **Manuscript Text** (Word Count: 2349)  
4  
5

6 **Introduction**  
7

8  
9  
10 Traumatic injury is a well-described risk factor for the development of venous thromboembolism  
11 (VTE). The incidence of VTE among trauma patients ranges from 20 to 90% without any  
12 preventative measure.<sup>1</sup> In addition, pulmonary embolism (PE) is the third most common cause of  
13 death in patients who survive the first 24 hours following injury.<sup>1-4</sup> Orthopaedic trauma patients  
14 in particular have several well-known risk factors for VTE placing them at exceptionally high  
15 risk.<sup>2, 5-8</sup> Fortunately, chemoprophylaxis has been shown to significantly reduce the incidence of  
16 VTE in this population.<sup>9</sup> However controversy exists as to the optimal VTE prophylaxis regimen  
17 in orthopaedic trauma patients.<sup>10-15</sup>  
18  
19

20  
21 For many orthopaedic populations, the American College of Chest Physicians (CHEST) and the  
22 Eastern Association for the Surgery of Trauma recommend enoxaparin (low molecular weight  
23 heparin (LMWH)) by subcutaneous injection for VTE prophylaxis, but recent studies show that  
24 oral acetylsalicylic acid (ASA) may be an equally effective alternative with lower risk of  
25 bleeding complications.<sup>10-15</sup> However, only limited data is available specific to orthopaedic  
26 trauma patients who may have even higher risk for both VTE events and bleeding.<sup>16</sup> The  
27 Orthopaedic Trauma Association Evidence Based Quality Value and Safety Committee  
28 highlights variability in prescribed regimens due to the poor scientific support for various  
29 regimens and emphasizes the need for guidelines to improve patient care.<sup>17</sup>  
30  
31

32  
33 The CHEST guidelines emphasize the need for systematic reviews of patient values and  
34 preferences when creating guidelines for specific populations.<sup>18</sup> Creation of guidelines requires  
35 making risk and benefit trade-offs, and patient values regarding VTE prophylaxis depend on the  
36  
37  
38  
39  
40  
41  
42  
43  
44  
45  
46  
47  
48  
49  
50  
51  
52  
53  
54  
55  
56  
57  
58  
59  
60

1  
2  
3 health outcomes considered. Furthermore, defining the heterogeneity of preferences in this  
4  
5 patient population is necessary to provide valuable individualized VTE prevention options.  
6  
7  
8 Implementing guidelines that consider patient preferences may increase patient satisfaction with  
9  
10 and improve adherence to clinical treatments.<sup>28</sup> Patient medication refusal is a leading cause of  
11  
12 non-administration of VTE prophylaxis in inpatients, and missed doses are highly associated  
13  
14 with increased VTE incidence.<sup>19-21</sup> In a study of medical and surgical patient preferences for  
15  
16 VTE prophylaxis regimens, the majority of patients preferred oral administration over  
17  
18 subcutaneous injection if all other factors were equal.<sup>22</sup> Patients who preferred subcutaneous  
19  
20 administration presumed a faster onset of action and were less likely to refuse administration.  
21  
22  
23 Existing VTE prevention studies do not evaluate patient preferences, investigate acceptable  
24  
25 trade-offs of the risks and benefits of those medications, or determine heterogeneity in  
26  
27 preferences based on demographic and clinical characteristics. The purpose of this study was to  
28  
29 elicit the preferences of orthopaedic trauma patients towards currently available VTE  
30  
31 prophylaxis, examine acceptable trade-offs of the potential complications related to those  
32  
33 medications, and determine heterogeneity in preferences among patient subgroups.  
34  
35  
36  
37  
38  
39  
40  
41  
42  
43

## 44 **Methods**

45  
46 A discrete choice experiment (DCE) was prospectively administered to orthopaedic trauma  
47  
48 patients at a level-1 trauma center. DCEs are a quantitative technique used to measure individual  
49  
50 preferences in a variety of health care settings by administering surveys that ask individuals to  
51  
52 choose the best option between two or more hypothetical scenarios, or choice sets.<sup>23-24,29</sup> Options  
53  
54 are described with a fixed set of attributes levels that vary in each scenario. The data collected  
55  
56  
57  
58  
59  
60



1  
2  
3 can be used to assess the relative importance of each attribute and acceptable trade-offs among  
4  
5 attributes. An estimate of preference can be described as the marginal utility for a given attribute  
6  
7 level. Marginal utility can be positive or negative, with numbers farther from zero indicating a  
8  
9 stronger preference. Monetary costs can be included to produce willingness-to-pay estimates.  
10  
11  
12  
13  
14  
15  
16

### 17 *Study setting and population*

18  
19  
20 This study was conducted at the R Adams Cowley Shock Trauma Center in Baltimore, Maryland  
21  
22 and received prior approval by the Institutional Review Board at the University of Maryland  
23  
24 School of Medicine. All adult ( $\geq 18$  years) patients treated with pelvic or acetabular fractures or  
25  
26 an operative extremity fracture were assessed for eligibility from November 2015 through  
27  
28 February 2016. Patients who were unable to consent due to intubation or altered mental status  
29  
30 and non-English speaking patients were excluded. Upon written consent, patients were enrolled  
31  
32 in the study as inpatients or at an outpatient follow-up appointment within 4 months from their  
33  
34 initial admission for their injury.  
35  
36  
37  
38  
39  
40  
41  
42

### 43 *Study design*

44  
45  
46 The attributes and their corresponding levels were selected based on a literature review, patient  
47  
48 interviews, expert consultation, and a retrospective review of patient outcomes. Medication  
49  
50 attributes used in the DCE included medication administration route (oral tablet vs. needle  
51  
52 injection), cost, possible side effects including bruising or stomach pain, risk of having a  
53  
54 bleeding complication that requires a blood transfusion, risk of having a wound complication that  
55  
56  
57  
58  
59  
60

1  
2  
3 requires another operation, risk of VTE requiring therapeutic anticoagulation for 6 months, and  
4 risk of death due to PE. These attributes were chosen to reflect medication qualities that patients  
5 are aware of when taking medications (route, cost, side effects) and clinically-important  
6 outcomes.  
7  
8  
9  
10

11  
12  
13 Forty choice sets were developed using a Bayesian D-optimal design with JMP Version 12  
14 software (SAS Institute, Cary, NC) to ensure maximum variation in attribute comparison. The 40  
15 choice sets were then randomly divided into four surveys, each with 10 choice sets, to minimize  
16 respondent burden. As documented by Sandor et al,<sup>30</sup> using heterogeneous designs produce  
17 substantial improvements in efficiency over a single survey and provides more precision in  
18 estimating true parameters. Each choice set compared two hypothetical VTE prophylaxis  
19 medications described by their attributes (**Figure 1**). Patients were randomly assigned one of the  
20 four self-administered surveys. A member of the research staff was available for questions as the  
21 study participant completed the survey. Demographic data including age, sex, race (as defined by  
22 the participant), type of injury, Injury Severity Score, American Society of Anesthesiologists  
23 (ASA) physical status, income, health insurance status, days on prophylaxis, and timing of  
24 recruitment (inpatient vs. outpatient) was collected from both the survey and the medical record.  
25 The target sample size for this study was derived by the Rule of Thumb calculation described by  
26 Orme and our a priori decision to conduct multiple subgroup analyses.<sup>31</sup> Based on this  
27 calculation,<sup>31</sup> we determined that a sample of 25 study participants would be required in each  
28 possible sub-group category for adequate statistical power. Given known proportions of  
29 admission data for this population, a sample size exceeding 200 participants was required to  
30 adequately assess heterogeneity in preferences, particularly on sex, race, and health insurance  
31 status.  
32  
33  
34  
35  
36  
37  
38  
39  
40  
41  
42  
43  
44  
45  
46  
47  
48  
49  
50  
51  
52  
53  
54  
55  
56  
57  
58  
59  
60

### *Data Analysis*

Data collected through the DCE survey allows the quantification of and statistical inference about the relative importance of VTE prophylaxis medication attributes. A multinomial logit model,<sup>32,33</sup> with effects coding, was used to estimate patient preferences using marginal utility, willingness-to-pay (WTP), and acceptable trade-off estimates for a 1% reduction in VTE complications or side effects. Marginal utility is a measure of patient preference, with the estimate signifying the strength and direction of one's preference towards the attribute. With this analysis, we are able to determine the relative magnitude of patient preferences to avoid VTE-related complications in association with their medication choice. Preference heterogeneity was subsequently assessed by adding an interaction term into the model with a priori determined variables of interest. These variables included age (categorized as <40, 40 – 59, >60), sex, race, ASA status ( $\leq 2$  vs.  $> 2$ ), the location of primary injury (upper extremity vs. lower extremity), household income (categorized as  $\leq \$20,000$ ,  $\$20,000 - \$49,999$ ,  $\$50,000 - \$74,999$ ,  $\geq \$75,000$ ), health insurance status (any vs. none), and the location of recruitment. All data analysis was conducted using the Choice Modeling platform in JMP Version 12.

### **Results**

Of the 310 patients screened for participation, 50 were ineligible (40 unable to consent due to altered mental status, 8 non-English speaking, 2 contraindicated for VTE prophylaxis) and 28 (11%) patients refused participation. Of the 232 patients included in the analysis, the mean age was 47.9 years, with 56.9% male, and 66.8% were white. The majority of participants had a

1  
2  
3 lower extremity injury (83.6%), with a mean injury severity score of 11.7, and were fully insured  
4  
5 (83.1%) (**Table 1**).

6  
7  
8  
9 Patients most strongly preferred a reduction in risk of death by PE (marginal utility, 4.57;  
10  
11  $P<0.0001$ ), distantly followed by a reduction in the risk of VTE requiring therapeutic  
12  
13 anticoagulation, wound complications requiring another surgery, and bleeding complications  
14  
15 requiring a transfusion (**Table 2**). Patients were willing to pay \$1686.90 for a 1% absolute  
16  
17 reduction in risk of death due to PE compared to \$92.29 or less for a 1% absolute reduction in  
18  
19 any of the other measured outcome variables. Patients also preferred to take oral tablets  
20  
21 (marginal utility, 0.16;  $P<0.0001$ ) and were willing to pay \$117.45 to receive prophylaxis via  
22  
23 oral route over subcutaneous injection. Possible medication side effects, such as stomach pain or  
24  
25 bruising, did not significantly influence patient preferences ( $P>0.1$ ).

26  
27  
28  
29  
30  
31 To change patient preference in favor of injections requires a 6.98% absolute reduction in the  
32  
33 risk of bleeding complications requiring transfusion, a 4.53% absolute reduction in the risk of  
34  
35 wound complications requiring reoperation, and a 1.27% absolute reduction in risk of VTE  
36  
37 requiring therapeutic anticoagulation (**Table 3**). In contrast, only a 0.07% absolute reduction in  
38  
39 risk of death due to PE was needed to change patient preference.

40  
41  
42  
43 In our subgroup analyses examining heterogeneity in preferences, patients who were female,  
44  
45 white, or had lower extremity injuries demonstrated significantly stronger preference for oral  
46  
47 VTE prophylaxis over subcutaneous injections ( $P<0.05$ ) (**Table 4**). Patients with upper extremity  
48  
49 injuries valued a reduction in risk of bleeding complications more than patients with lower  
50  
51 extremity injuries ( $P=0.01$ ). Patients who were recruited as an inpatient valued a reduction in risk  
52  
53 of wound complications requiring reoperation more than patients who were recruited from the  
54  
55  
56  
57  
58  
59  
60

1  
2  
3 outpatient clinic ( $P<0.01$ ). There were no other significant associations between the tested  
4  
5  
6 covariates and our included VTE prophylaxis attributes.  
7  
8  
9

## 11 **Discussion**

12  
13  
14  
15 Consistent with previous studies,<sup>22</sup> our study demonstrates a strong patient preference for oral  
16  
17 VTE prophylaxis over subcutaneous injection when all other relevant attributes are equal.

18  
19 However, patients only required a small reduction in the absolute risk of death due to PE to  
20  
21 change their preference in favor of an injection. When choosing between VTE prophylaxis  
22  
23 regimens, patients most valued (in order): risk of death due to PE, risk of VTE requiring  
24  
25 therapeutic anticoagulation, risk of wound complications requiring reoperation, and risk of  
26  
27 bleeding complications requiring transfusion. A defined reduction in any of these outcomes  
28  
29 could change patient preference to favor the injection route. In addition, underlying patient  
30  
31 factors such as sex, race, type of injury, and inpatient status led to significant heterogeneity in  
32  
33 patient preferences.  
34  
35  
36  
37  
38

39  
40 To our knowledge, our study is the first to assess the weight of patient-valued outcomes  
41  
42 regarding potential risks and complications of VTE prophylaxis. The study also determined  
43  
44 patient characteristics associated with heterogeneity in their preferences. Previous studies have  
45  
46 shown that patient refusal is a common reason for missed VTE doses and increases the risk of a  
47  
48 VTE event.<sup>19-22</sup> Patient preference for oral medications is also well-documented.<sup>22,25</sup> Our study  
49  
50 also demonstrates a strong preference for oral medications, but our results show that this  
51  
52 preference can change if the risk of the aforementioned patient-important outcomes is high  
53  
54 enough. Patients were particularly concerned about the risk of death due to PE, requiring only a  
55  
56  
57  
58  
59  
60

1  
2  
3 0.07% absolute reduction in risk of death to change patient preference in favor of an injection. In  
4  
5 addition, only relatively small reductions in the risk of other outcomes were required to change  
6  
7 patient preference. Furthermore, the preference for route varied significantly depending on the  
8  
9 patient's sex, race, type of injury, and inpatient status.  
10  
11

12  
13 While the design of the DCE enables the assessment of risk-benefit trade-offs among subgroups,  
14  
15 it does not allow for qualitative analysis of patient preferences. As a result, we are only able to  
16  
17 speculate as to why patients valued certain outcomes more than others. In addition, the choice  
18  
19 sets were hypothetical scenarios and patient's actual choices may be different. The greater value  
20  
21 placed on risk of death due to PE compared to other outcome measures could be a result of death  
22  
23 being the easiest outcome variable for the average patient to understand. We were unable to  
24  
25 control for patient disposition in our analysis (home vs. rehab), but we did compare responses of  
26  
27 inpatients to outpatients. Patients who were recruited as an inpatient were more concerned about  
28  
29 the risk of reoperation than patients recruited as outpatients, potentially because their injury and  
30  
31 initial operation were more recent in their memory. In addition, study participants had varying  
32  
33 lengths of VTE prophylaxis prescribed at time of recruitment and some patients were closer to  
34  
35 time of injury and initial operation than others. Although, when assessed, time since injury did  
36  
37 not affect patient preferences.  
38  
39  
40  
41  
42  
43  
44

45 Some participants had personal experience with one or more of the measured outcomes while  
46  
47 others had no history of complications, which we were unable to control for in our final analysis.  
48  
49 In the same manner, the mean ISS of our sample was 11.7, likely as a result of many patients  
50  
51 having isolated orthopaedic injuries as well as more severely injured patients not having the  
52  
53 mental capacity to complete the survey. ISS ranged from 4-34, but there is the possibility that our  
54  
55 results may suffer from some respondent bias if trying to extrapolate to a more severely injured  
56  
57  
58  
59  
60

1  
2  
3 population. Lastly, we did not collect data on patient education level which could affect the  
4  
5 patient's understanding of certain outcomes, however income and insurance level may be  
6  
7 surrogate markers for education and were included in the analysis.  
8  
9

10  
11 In the current era of patient-centered healthcare, it is important that we consider all outcomes that  
12  
13 patients value and the heterogeneity in those preferences when conducting clinical comparative  
14  
15 effectiveness research and when making clinical guidelines in order to improve healthcare  
16  
17 delivery and reduce cost.<sup>26, 27, 28</sup> Our data demonstrate that orthopaedic trauma patients prefer  
18  
19 VTE prophylaxis by oral tablet to prophylaxis by subcutaneous injection when all other relevant  
20  
21 attributes are equal. However, the risk of death due to PE is the dominant concern when choosing  
22  
23 a regimen. Our study is the first to document the value patients place on various clinically-  
24  
25 important outcomes related to VTE prophylaxis. In addition, we define the underlying patient  
26  
27 factors that contribute to variation in VTE prophylaxis preferences with risk-benefit trade-offs  
28  
29 among subgroups in this important area of ongoing debate. In the era of patient-centered  
30  
31 healthcare, future studies and clinical guideline recommendations comparing available VTE  
32  
33 prophylaxis regimens should focus on the outcomes most important to patients and incorporate  
34  
35 patient trade-off estimates to ensure their work is reflective of patient preferences.  
36  
37  
38  
39  
40  
41  
42  
43  
44  
45  
46  
47  
48  
49  
50  
51  
52  
53  
54  
55  
56  
57  
58  
59  
60

**Table 1** Characteristics of orthopaedic fracture participants (n=232)

| Characteristic                      | Mean (SD)   |
|-------------------------------------|-------------|
| Male, No. (%)                       | 132 (56.9)  |
| Age, y                              | 47.9 (17.7) |
| Race, No. (%)                       |             |
| White                               | 155 (66.8)  |
| Black                               | 62 (26.7)   |
| Other                               | 8 (3.4)     |
| Hispanic                            | 7 (3.0)     |
| Primary Orthopaedic Injury, No. (%) |             |
| Lower Extremity                     | 194 (83.6)  |
| Upper Extremity                     | 38 (16.4)   |
| ASA, <sup>1</sup> No. (%)           |             |
| 1                                   | 21 (9.1)    |
| 2                                   | 117 (50.4)  |
| 3                                   | 81 (34.9)   |
| 4                                   | 11 (4.7)    |
| Unknown                             | 2 (0.9)     |
| Injury severity score (ISS)         | 11.7 (6.7)  |
| Income, \$USD, No. (%)              |             |
| <\$10,000                           | 46 (19.8)   |
| \$10,000 - \$19,999                 | 20 (8.6)    |
| \$20,000 - \$34,999                 | 35 (15.1)   |
| \$35,000-\$49,999                   | 24 (10.3)   |
| \$50,000 - \$74,999                 | 26 (11.1)   |
| \$75,000 - \$100,000                | 24 (10.3)   |
| >\$100,000                          | 35 (15.1)   |
| Unknown                             | 22 (9.5)    |
| Health Insurance, No. (%)           |             |
| Fully Insured                       | 193 (83.1)  |
| Partially Insured                   | 12 (5.2)    |
| Uninsured                           | 24 (10.3)   |
| Unknown                             | 3 (1.3)     |
| Timing of recruitment No. (%)       |             |
| In-patient                          | 78 (33.6)   |
| Out-patient                         | 154 (66.4)  |

**Notes:**

<sup>1</sup> The American Society of Anesthesiologists (ASA) physical status classification system for assessing pre-operative patient fitness.

<sup>2</sup> Injury Severity Score (ISS) is a well-validated score that assesses trauma severity based on a consensus-derived severity score that classifies each injury from six body regions (head or neck, face, chest,



1  
2  
3 abdomen, extremities, external). A score greater than 15 is commonly referred to as a major trauma (or  
4 polytrauma).  
5  
6  
7  
8  
9  
10  
11  
12  
13  
14  
15  
16  
17  
18  
19  
20  
21  
22  
23  
24  
25  
26  
27  
28  
29  
30  
31  
32  
33  
34  
35  
36  
37  
38  
39  
40  
41  
42  
43  
44  
45  
46  
47  
48  
49  
50  
51  
52  
53  
54  
55  
56  
57  
58  
59  
60

For peer review only

**Table 2** Patient preferences and valuation of venous thromboembolism prophylaxis attributes

| Attribute                                     | Level             | Marginal Utility | 95% CI        | WTP       | P Value |
|-----------------------------------------------|-------------------|------------------|---------------|-----------|---------|
| Route                                         | Oral tablet       | 0.16             | 0.11 - 0.21   | \$117.45  | <0.0001 |
|                                               | Injection         | -0.16            | -0.21 – -0.11 | -         | -       |
| Side Effects                                  | Bruising on leg   | -0.04            | -0.11 – 0.02  | -\$45.94  | 0.11    |
|                                               | Stomach pain      | -0.04            | -0.12 – 0.04  | -\$44.08  | -       |
|                                               | No side effects   | 0.08             | 0.003 – 0.16  | \$45.08   | -       |
| Bleeding complications requiring transfusion  | Reduce risk by 1% | 0.05             | 0.04 – 0.05   | \$16.83   | <0.0001 |
| Wound complications requiring another surgery | Reduce risk by 1% | 0.07             | 0.06 – 0.08   | \$25.91   | <0.0001 |
| Blood clot requiring long-term medication     | Reduce risk by 1% | 0.25             | 0.15 – 0.36   | \$92.29   | <0.0001 |
| Death due to PE                               | Reduce risk by 1% | 4.57             | 3.26 – 5.89   | \$1686.90 | <0.0001 |
| Cost                                          | \$10 increase     | -0.03            | -0.04 – -0.02 | Reference | <0.0001 |

PE = pulmonary embolism; CI = confidence interval; WTP = willingness to pay

**Note:** Marginal utility quantifies the additional satisfaction gained by the patient for each described attribute/level. Negative marginal utility values signify an aversion to or dissatisfaction with the described attribute/level. All risk reductions are absolute. Willingness to pay for the route and side effects category is based on the full treatment course, not per dose. Willingness to pay for all other attributes are based on the incremental change in level.

**Table 3** The absolute risk reduction (ARR) of a potential complication that a patient would be willing to accept to change their route preference from oral to injection prophylaxis

| <b>Attribute</b>                              | <b>Acceptable ARR Trade-off</b> |
|-----------------------------------------------|---------------------------------|
| Bleeding complications requiring transfusion  | 6.98%                           |
| Wound complications requiring another surgery | 4.53%                           |
| Blood clot requiring long-term medication     | 1.27%                           |
| Death due to PE                               | 0.07%                           |

ARR = absolute risk reduction; PE = pulmonary embolism

For peer review only

**Table 4** Sub-group analysis quantifying heterogeneity in patient preferences

| Attribute                                     | Level                           | Sub-Group                 | Marginal Utility | 95% CI         | WTP      | P Value |
|-----------------------------------------------|---------------------------------|---------------------------|------------------|----------------|----------|---------|
| Route                                         | Take oral tablet over injection | Sex [Female]              | 0.07             | 0.02 – 0.11    | \$201.24 | <0.01   |
|                                               |                                 | Sex [Male]                | -0.07            | -0.11 - -0.02  | \$66.79  |         |
|                                               |                                 | Race [White]              | 0.09             | 0.03 – 0.14    | \$182.23 | <0.01   |
|                                               |                                 | Race [Black]              | -0.09            | -0.14 - -0.03  | \$18.48  |         |
|                                               |                                 | Injury [Lower Extremity]  | 0.08             | 0.02 – 0.15    | \$132.38 | 0.01    |
|                                               |                                 | Injury [Upper Extremity]  | -0.08            | -0.15 - -0.02  | \$18.98  |         |
| Bleeding complications requiring transfusion  | Reduce risk by 1%               | Injury [Lower Extremity]  | -0.02            | -0.03 - -0.003 | \$14.50  | 0.01    |
|                                               |                                 | Injury [Upper Extremity]  | 0.02             | 0.003 – 0.03   | \$32.04  |         |
| Wound complications requiring another surgery | Reduce risk by 1%               | Recruitment [In-patient]  | 0.02             | 0.003 – 0.03   | \$46.32  | <0.01   |
|                                               |                                 | Recruitment [Out-patient] | -0.02            | -0.03 – -0.003 | \$20.24  |         |

CI = confidence interval; WTP = willingness to pay

**Note:** Marginal utility quantifies the additional satisfaction gained by the patient for each described attribute/level. Negative marginal utility values signify an aversion to or dissatisfaction with the described attribute/level. All willingness to pay values are presented in reference to a less preferred option. For example, both females and males prefer oral tablets compared to an injection. However, females are willing to pay more for an oral tablet over an injection than males are willing to pay for that same tradeoff (oral tablet over an injection). Willingness to pay values for attributes with continuous levels estimate the willingness to pay for an additional 1% absolute reduction in risk.

1  
2  
3 **Figure 1:** Sample question from the discrete choice experiment survey administered to  
4 participants. In each question the values for each hypothetical medication are varied.  
5  
6  
7  
8  
9  
10  
11  
12  
13  
14  
15  
16  
17  
18  
19  
20  
21  
22  
23  
24  
25  
26  
27  
28  
29  
30  
31  
32  
33  
34  
35  
36  
37  
38  
39  
40  
41  
42  
43  
44  
45  
46  
47  
48  
49  
50  
51  
52  
53  
54  
55  
56  
57  
58  
59  
60

For peer review only

## Acknowledgments

The authors thank all of the respondents for their time and participation in the study.

## Author Contribution

BH contributed to the literature search, study design, data collection, data interpretation, writing, and critical revision. NNO contributed to the literature search, study design, data analysis, data interpretation, writing, and critical revision. CDM contributed to the data interpretation and critical revision. DS, TTM, HJ, RVO, and GPS contributed to the literature search, study design, data interpretation, and critical revision. RC contributed to the study design, data analysis, data interpretation, and critical revision. All authors have approved the final version of the article submitted and agree to be accountable for all aspects of the work.

## Funding

Research reported in this manuscript was funded through a Patient-Centered Outcomes Research Institute (PCORI) Award (PCS-1511-32745). The views in this publication are solely the responsibility of the authors and do not necessarily represent the views of the Patient-Centered Outcomes Research Institute (PCORI), its Board of Governors or Methodology Committee.

## Competing interests

1  
2  
3 All authors have completed the ICMJE uniform disclosure form at  
4 [www.icmje.org/coi\\_disclosure.pdf](http://www.icmje.org/coi_disclosure.pdf) and declare: no support from any organisation for the  
5  
6 submitted work; no financial relationships with any organisations that might have an interest in  
7  
8 the submitted work in the previous three years other than those listed below; no other  
9  
10 relationships or activities that could appear to have influenced the submitted work apart from the  
11  
12 following:  
13  
14

15  
16  
17  
18 Dr. Mullins reports consulting with Bayer, Daiichi Sankyo, Janssen/J&J, Mundipharma, Novo  
19  
20 Nordisk, and Pfizer and receiving grants from Bayer, Novartis, Merck, and Pfizer. Dr. Stein  
21  
22 reports receiving grants from the US Air Force and serves as an advisor for Decisio Health, Inc.  
23  
24 Dr. Manson reports consulting with Stryker, Globus, and Smith & Nephew, being paid for expert  
25  
26 testimony from various law firms, and payment for lectures by the Maine Review Course. Dr.  
27  
28 O'Toole reports consulting with Coorstek (Zimmer) and Smith & Nephew and receiving  
29  
30 royalties from Coorstek. Dr. Slobogean reports payments for presenting by Zimmer Biomet. No  
31  
32 other disclosures were reported.  
33  
34  
35  
36  
37  
38  
39  
40

#### 41 **Data sharing statement**

42  
43  
44 No additional data are available.  
45  
46  
47  
48  
49  
50  
51  
52  
53  
54  
55  
56  
57  
58  
59  
60

## References

1. Shackford SR, Moser KM. Deep venous thrombosis and pulmonary embolism in trauma patients. *J Intensive Care Med.* 1988; 3(2):87-98.
2. Geerts WH, Code KI, Jay RM, et al. A prospective study of venous thromboembolism after major trauma. *N Engl J Med.* 1994;331(24):1601–1606.
3. O'Malley KF, Ross SE. Pulmonary embolism in major trauma patients. *J Trauma.* 1990;30(6):748–750.
4. Sevitt S, Gallagher N. Venous thrombosis and pulmonary embolism. A clinico-pathological study in injured and burned patients. *Br J Surg.* 1961;48:475–489.
5. Shackford SR, Davis JW, Hollingsworth-Fridlund P, et al. Venous thromboembolism in patients with major trauma. *Am J Surg.* 1990;159(4):365–369.
6. Abelseth G, Buckley RE, Pineo GE, et al. Incidence of deep-vein thrombosis in patients with fractures of the lower extremity distal to the hip. *J Orthop Trauma.* 1996;10(4):230–235.
7. Rogers FB. Venous thromboembolism in trauma patients: a review. *Surgery.* 2001;130(1):1–12.
8. Hak DJ. Prevention of venous thromboembolism in trauma and long bone fractures. *Curr Opin Pulm Med.* 2001;7(5):338–343.
9. Sannard JP, Lopez-Ben RR, Volgas DA, et al. Prophylaxis against deep-vein thrombosis following trauma: a prospective, randomized comparison of mechanical and



- 1  
2  
3 pharmacologic prophylaxis. *J Bone Joint Surg Am.* 2006;88(2):261-266.  
4  
5  
6  
7 10. Falck-Ytter Y, Francis CW, Johanson NA, et al. Prevention of VTE in orthopaedic  
8 surgery patients: Antithrombotic Therapy and Prevention of Thrombosis, 9th ed:  
9 American College of Chest Physicians Evidence-Based Clinical Practice Guidelines.  
10  
11 *Chest.* 2012;141(2 Suppl):e278S–325S.  
12  
13  
14  
15  
16  
17 11. Hill J, Treasure T, National Clinical Guideline Centre for Acute and Chronic Conditions.  
18 Reducing the risk of venous thromboembolism in patients admitted to hospital: summary  
19 of NICE guidance. *BMJ.* 2010;340:c95.  
20  
21  
22  
23  
24  
25  
26 12. Mont MA, Jacobs JJ. Preventing venous thromboembolic disease in patients undergoing  
27 elective hip and knee arthroplasty. *J Am Acad Orthop Surg.* 2011;19(12):768–776.  
28  
29  
30  
31 13. Anderson DR, Dunbar MJ, Bohm ER, et al. Aspirin versus low-molecular-weight heparin  
32 for extended venous thromboembolism prophylaxis after total hip arthroplasty: a  
33 randomized trial. *Ann Intern Med.* 2013;158(11):800-806.  
34  
35  
36  
37  
38  
39 14. Sahebally SM, Healy D, Walsh SR. Aspirin in the primary prophylaxis of venous  
40 thromboembolism in surgical patients. *Surgeon.* 2015;13(6):348-58.  
41  
42  
43  
44  
45 15. Drescher FS, Sirovich BE, Lee A, et al. Aspirin versus anticoagulation for prevention of  
46 venous thromboembolism major lower extremity orthopedic surgery: a systematic review  
47 and meta-analysis. *J Hosp Med.* 2014; 9(9):579-585.  
48  
49  
50  
51  
52  
53 16. Barrera LM, Perel P, Ker K, et al. Thromboprophylaxis for trauma patients. *Cochrane*  
54  
55 *Database Syst Rev.* 2013;3:CD008303.  
56  
57  
58  
59  
60

- 1  
2  
3  
4  
5  
6  
7  
8  
9  
10  
11  
12  
13  
14  
15  
16  
17  
18  
19  
20  
21  
22  
23  
24  
25  
26  
27  
28  
29  
30  
31  
32  
33  
34  
35  
36  
37  
38  
39  
40  
41  
42  
43  
44  
45  
46  
47  
48  
49  
50  
51  
52  
53  
54  
55  
56  
57  
58  
59  
60
17. Sagi HC, Ahn J, Ciesla D, et al. Venous Thromboembolism Prophylaxis in Orthopaedic Trauma Patients: A Survey of OTA Member Practice Patterns and OTA Expert Panel Recommendations. *J Orthop Trauma*. 2015;29(10):e355-62.
  18. MacLean S, Mulla S, Akl EA, et al. Patient values and preferences in decision making for antithrombotic therapy: a systematic review. American College of Chest Physicians evidenced-based clinical practice guidelines. Antithrombotic Therapy and Prevention of Thrombosis, 9<sup>th</sup> ed. *Chest*. 2012;141(2 Suppl):e1S-23S.
  19. Shermock KM, Lau BD, Haut ER, et al. Patterns of non-administration of ordered doses of venous thromboembolism prophylaxis: implications for novel intervention strategies. *PLoS One*. 2013;8(6):e66311.
  20. Haut ET, Lau BD, Kraus PS, et al. Preventability of Hospital-Acquired Venous Thromboembolism. *JAMA Surg*. 2015;150(9):912-915.
  21. Louis SG, Sato M, Geraci T, et al. Correlation of missed doses of enoxaparin with increased incidence of deep vein thrombosis in trauma and general surgery patients. *JAMA Surg*. 2014;149(4):365-370.
  22. Wong A, Kraus PS, Lau BD, et al. Patient preferences regarding pharmacologic venous thromboembolism prophylaxis. *J Hosp Med*. 2015;10(2):108-111.
  23. Bridges JF, Hauber AB, Marshall D, et al. Conjoint analysis applications in health—a checklist: a report of the ISPOR Good Research Practices for Conjoint Analysis Task Force. *Value Health*. 2011;14(4):403-413.

- 1  
2  
3  
4  
5  
6  
7  
8  
9  
10  
11  
12  
13  
14  
15  
16  
17  
18  
19  
20  
21  
22  
23  
24  
25  
26  
27  
28  
29  
30  
31  
32  
33  
34  
35  
36  
37  
38  
39  
40  
41  
42  
43  
44  
45  
46  
47  
48  
49  
50  
51  
52  
53  
54  
55  
56  
57  
58  
59  
60
24. Luyten J, Kessels R, Goos P, et al. Public preferences for prioritizing preventative and curative health care interventions: a discrete choice experiment. *Value Health*. 2015;18(2):224-233.
  25. Jin J, Sklar GE, Min Sen Oh V, et al. Factors affecting therapeutic compliance: a review from the patient's perspective. *Ther Clin Risk Manag*. 2008;4(1):269-286.
  26. Tunis SR, Clarke M, Gorst SL, et al. Improving the relevance and consistency of outcomes in comparative effectiveness research. *J Comp Eff Res*. 2016;5(2):193-205.
  27. Price-Haywood EG. Clinical comparative effectiveness research through the lens of healthcare decisionmakers. *Ochsner J*. 2015;15(2):154-161.
  28. Krahn M, Naglie G. The next step in guideline development: incorporating patient preferences. *JAMA*. 2008;300(4):436-438.
  29. Ryan M, Farrar S. Using conjoint analysis to elicit preferences for health care. *BMJ*. 2000;320(7248):1530-1533.
  30. Sándor Z, Wedel M. Heterogeneous conjoint choice designs. *J Market Res*. 2001;42(2):210-218.
  31. Orme B. Sample size issues for conjoint analysis studies. Sequim: Sawtooth Software Technical Paper; 1998.
  32. McFadden D. Econometric models for probabilistic choice among products. *Journal of Business*. 1980 Jul 1:S13-29.

1  
2  
3  
4  
5  
6  
7  
8  
9  
10  
11  
12  
13  
14  
15  
16  
17  
18  
19  
20  
21  
22  
23  
24  
25  
26  
27  
28  
29  
30  
31  
32  
33  
34  
35  
36  
37  
38  
39  
40  
41  
42  
43  
44  
45  
46  
47  
48  
49  
50  
51  
52  
53  
54  
55  
56  
57  
58  
59  
60

33. Louviere JJ, Flynn TN, Carson RT. Discrete choice experiments are not conjoint analysis. *J Choice Model.* 2010;3:57–72.

For peer review only

1  
2  
3  
4  
5  
6  
7  
8  
9  
10  
11  
12  
13  
14  
15  
16  
17  
18  
19  
20  
21  
22  
23  
24  
25  
26  
27  
28  
29  
30  
31  
32  
33  
34  
35  
36  
37  
38  
39  
40  
41  
42  
43  
44  
45  
46  
47  
48  
49  
50  
51  
52  
53  
54  
55  
56  
57  
58  
59  
60

Which medication would you prefer?

|                                                                                               | Medication A                                                                                         | Medication B                                                                                           |
|-----------------------------------------------------------------------------------------------|------------------------------------------------------------------------------------------------------|--------------------------------------------------------------------------------------------------------|
| Type of daily medication                                                                      | Oral pill                                                                                            | Needle injection                                                                                       |
| What will it cost you                                                                         | \$100                                                                                                | \$50                                                                                                   |
| Possible side effect                                                                          | None                                                                                                 | Bruising on leg                                                                                        |
| Chance that you will have a bleeding complication and need a blood transfusion                | 10 out of 1000<br>  | 100 out of 1000<br> |
| Chance that you will have wound complication and need another operation                       | 50 out of 1000<br>  | 100 out of 1000<br> |
| Chance that you will have a blood clot and have to take medications for 6 months              | 20 out of 1000<br> | 10 out of 1000<br> |
| Chance of death due to a pulmonary embolism                                                   | 1 out of 1000<br> | 1 out of 1000<br> |
| Check one  | Prefer Medication A<br><input type="checkbox"/>                                                      | Prefer Medication B<br><input type="checkbox"/>                                                        |

Figure 1. Sample question from the discrete choice experiment survey administered to participants. In each question the values for each hypothetical medication are varied.

172x209mm (300 x 300 DPI)

STROBE Statement—Checklist of items that should be included in reports of *cross-sectional studies*

|                              | Item No | Recommendation                                                                                                                                                                                                             |
|------------------------------|---------|----------------------------------------------------------------------------------------------------------------------------------------------------------------------------------------------------------------------------|
| <b>Title and abstract</b>    | 1       | (a) Indicate the study's design with a commonly used term in the title or the abstract<br><b>Page 1</b>                                                                                                                    |
|                              |         | (b) Provide in the abstract an informative and balanced summary of what was done and what was found <b>Page 2</b>                                                                                                          |
| <b>Introduction</b>          |         |                                                                                                                                                                                                                            |
| Background/rationale         | 2       | Explain the scientific background and rationale for the investigation being reported<br><b>Page 4-5</b>                                                                                                                    |
| Objectives                   | 3       | State specific objectives, including any prespecified hypotheses <b>Page 5</b>                                                                                                                                             |
| <b>Methods</b>               |         |                                                                                                                                                                                                                            |
| Study design                 | 4       | Present key elements of study design early in the paper <b>Page 5-6</b>                                                                                                                                                    |
| Setting                      | 5       | Describe the setting, locations, and relevant dates, including periods of recruitment, exposure, follow-up, and data collection <b>Page 6</b>                                                                              |
| Participants                 | 6       | (a) Give the eligibility criteria, and the sources and methods of selection of participants <b>Page 6</b>                                                                                                                  |
| Variables                    | 7       | Clearly define all outcomes, exposures, predictors, potential confounders, and effect modifiers. Give diagnostic criteria, if applicable <b>Page 6-7</b>                                                                   |
| Data sources/<br>measurement | 8*      | For each variable of interest, give sources of data and details of methods of assessment (measurement). Describe comparability of assessment methods if there is more than one group <b>Page 7</b>                         |
| Bias                         | 9       | Describe any efforts to address potential sources of bias <b>Page 7-8</b>                                                                                                                                                  |
| Study size                   | 10      | Explain how the study size was arrived at <b>Page 7</b>                                                                                                                                                                    |
| Quantitative variables       | 11      | Explain how quantitative variables were handled in the analyses. If applicable, describe which groupings were chosen and why                                                                                               |
| Statistical methods          | 12      | (a) Describe all statistical methods, including those used to control for confounding<br><b>Page 7-8</b>                                                                                                                   |
|                              |         | (b) Describe any methods used to examine subgroups and interactions <b>Page 7-8</b>                                                                                                                                        |
|                              |         | (c) Explain how missing data were addressed <b>Page 7-8</b>                                                                                                                                                                |
|                              |         | (d) If applicable, describe analytical methods taking account of sampling strategy                                                                                                                                         |
|                              |         | (e) Describe any sensitivity analyses <b>Page 7-8</b>                                                                                                                                                                      |
| <b>Results</b>               |         |                                                                                                                                                                                                                            |
| Participants                 | 13*     | (a) Report numbers of individuals at each stage of study—eg numbers potentially eligible, examined for eligibility, confirmed eligible, included in the study, completing follow-up, and analysed <b>Page 8</b>            |
|                              |         | (b) Give reasons for non-participation at each stage <b>Page 8</b>                                                                                                                                                         |
|                              |         | (c) Consider use of a flow diagram                                                                                                                                                                                         |
| Descriptive data             | 14*     | (a) Give characteristics of study participants (eg demographic, clinical, social) and information on exposures and potential confounders <b>Page 8</b>                                                                     |
|                              |         | (b) Indicate number of participants with missing data for each variable of interest                                                                                                                                        |
| Outcome data                 | 15*     | Report numbers of outcome events or summary measures <b>Page 8</b>                                                                                                                                                         |
| Main results                 | 16      | (a) Give unadjusted estimates and, if applicable, confounder-adjusted estimates and their precision (eg, 95% confidence interval). Make clear which confounders were adjusted for and why they were included <b>Page 9</b> |
|                              |         | (b) Report category boundaries when continuous variables were categorized <b>Page 9</b>                                                                                                                                    |
|                              |         | (c) If relevant, consider translating estimates of relative risk into absolute risk for a                                                                                                                                  |

|                          |    |                                                                                                                                                                                           |
|--------------------------|----|-------------------------------------------------------------------------------------------------------------------------------------------------------------------------------------------|
|                          |    | meaningful time period                                                                                                                                                                    |
| Other analyses           | 17 | Report other analyses done—eg analyses of subgroups and interactions, and sensitivity analyses <b>Page 9</b>                                                                              |
| <b>Discussion</b>        |    |                                                                                                                                                                                           |
| Key results              | 18 | Summarise key results with reference to study objectives <b>Page 9</b>                                                                                                                    |
| Limitations              | 19 | Discuss limitations of the study, taking into account sources of potential bias or imprecision. Discuss both direction and magnitude of any potential bias <b>Page 10-11</b>              |
| Interpretation           | 20 | Give a cautious overall interpretation of results considering objectives, limitations, multiplicity of analyses, results from similar studies, and other relevant evidence <b>Page 11</b> |
| Generalisability         | 21 | Discuss the generalisability (external validity) of the study results <b>Page 10</b>                                                                                                      |
| <b>Other information</b> |    |                                                                                                                                                                                           |
| Funding                  | 22 | Give the source of funding and the role of the funders for the present study and, if applicable, for the original study on which the present article is based <b>Page 17</b>              |

\*Give information separately for exposed and unexposed groups.

**Note:** An Explanation and Elaboration article discusses each checklist item and gives methodological background and published examples of transparent reporting. The STROBE checklist is best used in conjunction with this article (freely available on the Web sites of PLoS Medicine at <http://www.plosmedicine.org/>, Annals of Internal Medicine at <http://www.annals.org/>, and Epidemiology at <http://www.epidem.com/>). Information on the STROBE Initiative is available at [www.strobe-statement.org](http://www.strobe-statement.org).

# BMJ Open

## Patient Preferences for Venous Thromboembolism Prophylaxis After Injury: A Discrete Choice Experiment

|                                 |                                                                                                                                                                                                                                                                                                                                                                                                                                                                                                                                                                                                                                                                    |
|---------------------------------|--------------------------------------------------------------------------------------------------------------------------------------------------------------------------------------------------------------------------------------------------------------------------------------------------------------------------------------------------------------------------------------------------------------------------------------------------------------------------------------------------------------------------------------------------------------------------------------------------------------------------------------------------------------------|
| Journal:                        | <i>BMJ Open</i>                                                                                                                                                                                                                                                                                                                                                                                                                                                                                                                                                                                                                                                    |
| Manuscript ID                   | bmjopen-2017-016676.R2                                                                                                                                                                                                                                                                                                                                                                                                                                                                                                                                                                                                                                             |
| Article Type:                   | Research                                                                                                                                                                                                                                                                                                                                                                                                                                                                                                                                                                                                                                                           |
| Date Submitted by the Author:   | 26-May-2017                                                                                                                                                                                                                                                                                                                                                                                                                                                                                                                                                                                                                                                        |
| Complete List of Authors:       | Haac, Bryce; University of Maryland School of Medicine, General Surgery<br>O'Hara, Nathan; University of Maryland School of Medicine, Orthopaedics<br>Mullins, C; University of Maryland School of Pharmacy<br>Stein, DM; R Adams Cowley Shock Trauma Center, University of Maryland School of Medicine<br>Manson, Theodore; University of Maryland School of Medicine, Orthopaedics<br>Johal , Herman; McMaster University,<br>Castillo, Renan; Johns Hopkins University Bloomberg School of Public Health<br>O'Toole, Robert; University of Maryland School of Medicine, Orthopaedics<br>Slobogean, GP ; University of Maryland School of Medicine, Orthopaedics |
| <b>Primary Subject Heading</b>: | Patient-centred medicine                                                                                                                                                                                                                                                                                                                                                                                                                                                                                                                                                                                                                                           |
| Secondary Subject Heading:      | Haematology (incl blood transfusion), Health economics, Surgery                                                                                                                                                                                                                                                                                                                                                                                                                                                                                                                                                                                                    |
| Keywords:                       | Thromboembolism < CARDIOLOGY, Anticoagulation < HAEMATOLOGY, Trauma management < ORTHOPAEDIC & TRAUMA SURGERY, Adult surgery < SURGERY, Orthopaedic & trauma surgery < SURGERY                                                                                                                                                                                                                                                                                                                                                                                                                                                                                     |
|                                 |                                                                                                                                                                                                                                                                                                                                                                                                                                                                                                                                                                                                                                                                    |

SCHOLARONE™  
Manuscripts



1  
2  
3 **Patient Preferences for Venous Thromboembolism Prophylaxis After Injury: A Discrete**  
4  
5 **Choice Experiment**  
6  
7  
8  
9

10 Bryce E. Haac, MD<sup>1</sup>; Nathan N. O'Hara, MHA<sup>1</sup>; C. Daniel Mullins, PhD<sup>2</sup>; Deborah M. Stein,  
11 MD, MPH<sup>1</sup>; Theodore T. Manson, MD<sup>1</sup>; Herman Johal, MD, MPH, FRCSC<sup>3</sup>; Renan Castillo,  
12 PhD<sup>4</sup>; Robert V. O'Toole MD<sup>1</sup>; Gerard P. Slobogean, MD, MPH, FRCSC<sup>1</sup>  
13  
14  
15  
16  
17  
18  
19

- 20 1. University of Maryland School of Medicine, Baltimore, Maryland
- 21
- 22 2. University of Maryland School of Pharmacy, Baltimore, Maryland
- 23
- 24 3. McMaster University, Hamilton, Ontario
- 25
- 26 4. Johns Hopkins Bloomberg School of Public Health, Baltimore, Maryland
- 27  
28  
29  
30  
31

32 **Corresponding Author:**  
33

34 Gerard P. Slobogean, MD MPH FRCSC  
35

36 Department of Orthopaedics  
37

38 University of Maryland School of Medicine  
39

40 Suite 300, 110 S. Paca Street  
41

42 Baltimore, MD 21201 USA  
43

44 E-mail: gslobogean@umoa.umm.edu  
45

46 Phone: +1-410-328-6280  
47

48 Fax: +1-410-328-2893  
49  
50  
51  
52  
53  
54  
55  
56  
57  
58  
59  
60

## Abstract

**Objective:** Limited evidence for the optimal venous thromboembolism (VTE) prophylaxis regimen in orthopaedic trauma leads to variability in regimens. We sought to delineate patient preferences towards cost, complication profile, and administration route (oral tablet vs. subcutaneous injection).

**Design:** Discrete choice experiment (DCE).

**Setting:** Level 1 trauma center in Baltimore, USA.

**Participants:** 232 adult trauma patients (mean age 47.9 years) with pelvic or acetabular fractures or operative extremity fractures.

**Primary and secondary outcome measures:** Relative preferences and trade-off estimates for a 1% reduction in complications were estimated using multinomial logit modelling. Interaction terms were added to the model to assess heterogeneity in preferences.

**Results:** Patients preferred oral tablets over subcutaneous injections (marginal utility, 0.16; 95% CI: 0.11 - 0.21,  $P < 0.0001$ ). Preferences changed in favor of subcutaneous injections with an absolute risk reduction of 6.98% in bleeding, 4.53% in wound complications requiring reoperation, 1.27% in VTE, and 0.07% in death from pulmonary embolism (PE). Patient characteristics (sex, race, type of injury, time since injury) affected patient preferences ( $P < 0.01$ ).

**Conclusions:** Patients preferred oral prophylaxis and were most concerned about risk of death from PE. Furthermore, the findings estimated the trade-offs acceptable to patients and heterogeneity in preferences for VTE prophylaxis.

**Strengths and limitations of this study:**

- This study quantifies patient preferences for venous thromboembolism prophylaxis in a high risk, and often difficult to research, population.
- The results provide valuable benefit-risk tradeoffs estimates to guide clinicians in a common decisional dilemma.
- High face validity in the choice sets is demonstrated by the directionality, magnitude, and consistency of the responses.
- The high response rate captured in this prospective study reduces response bias present in other survey methods.
- The choice sets presented to respondents were hypothetical scenarios, and the respondent's actual choices may be different.

1  
2  
3 **Manuscript Text** (Word Count: 2349)  
4  
5

6 **Introduction**  
7

8  
9  
10 Traumatic injury is a well-described risk factor for the development of venous thromboembolism  
11 (VTE). The incidence of VTE among trauma patients ranges from 20 to 90% without any  
12 preventative measure.<sup>1</sup> In addition, pulmonary embolism (PE) is the third most common cause of  
13 death in patients who survive the first 24 hours following injury.<sup>1-4</sup> Orthopaedic trauma patients  
14 in particular have several well-known risk factors for VTE placing them at exceptionally high  
15 risk.<sup>2, 5-8</sup> Fortunately, chemoprophylaxis has been shown to significantly reduce the incidence of  
16 VTE in this population.<sup>9</sup> However controversy exists as to the optimal VTE prophylaxis regimen  
17 in orthopaedic trauma patients.<sup>10-15</sup>  
18  
19

20  
21 For many orthopaedic populations, the American College of Chest Physicians (CHEST) and the  
22 Eastern Association for the Surgery of Trauma recommend enoxaparin (low molecular weight  
23 heparin (LMWH)) by subcutaneous injection for VTE prophylaxis, but recent studies show that  
24 acetylsalicylic acid (aspirin), an oral tablet, may be an equally effective alternative with lower  
25 risk of bleeding complications.<sup>10-15</sup> However, only limited data is available specific to  
26 orthopaedic trauma patients who may have even higher risk for both VTE events and bleeding.<sup>16</sup>  
27  
28 The Orthopaedic Trauma Association Evidence Based Quality Value and Safety Committee  
29 highlights variability in prescribed regimens due to the poor scientific support for various  
30 regimens and emphasizes the need for guidelines to improve patient care.<sup>17</sup>  
31  
32

33  
34 The CHEST guidelines emphasize the need for systematic reviews of patient values and  
35 preferences when creating guidelines for specific populations.<sup>18</sup> Creation of guidelines requires  
36 making risk and benefit trade-offs, and patient values regarding VTE prophylaxis depend on the  
37  
38  
39  
40  
41  
42  
43  
44  
45  
46  
47  
48  
49  
50  
51  
52  
53  
54  
55  
56  
57  
58  
59  
60

1  
2  
3 health outcomes considered. Furthermore, defining the heterogeneity of preferences in this  
4  
5 patient population is necessary to provide valuable individualized VTE prevention options.  
6  
7  
8 Implementing guidelines that consider patient preferences may increase patient satisfaction with  
9  
10 and improve adherence to clinical treatments.<sup>19</sup> Patient medication refusal is a leading cause of  
11  
12 non-administration of VTE prophylaxis in inpatients, and missed doses are highly associated  
13  
14 with increased VTE incidence.<sup>20-22</sup> In a study of medical and surgical patient preferences for  
15  
16 VTE prophylaxis regimens, the majority of patients preferred oral administration over  
17  
18 subcutaneous injection if all other factors were equal.<sup>23</sup> Patients who preferred subcutaneous  
19  
20 administration presumed a faster onset of action and were less likely to refuse administration.  
21  
22  
23 Existing VTE prevention studies do not evaluate patient preferences, investigate acceptable  
24  
25 trade-offs of the risks and benefits of those medications, or determine heterogeneity in  
26  
27 preferences based on demographic and clinical characteristics. The purpose of this study was to  
28  
29 elicit the preferences of orthopaedic trauma patients towards currently available VTE  
30  
31 prophylaxis, examine acceptable trade-offs of the potential complications related to those  
32  
33 medications, and determine heterogeneity in preferences among patient subgroups.  
34  
35  
36  
37  
38  
39  
40  
41  
42  
43

## 44 **Methods**

45  
46 A discrete choice experiment (DCE) was prospectively administered to orthopaedic trauma  
47  
48 patients at a level-1 trauma center. DCEs are a quantitative technique used to measure individual  
49  
50 preferences in a variety of health care settings by administering surveys that ask individuals to  
51  
52 choose the best option between two or more hypothetical scenarios, or choice sets.<sup>24-26</sup> Options  
53  
54 are described with a fixed set of attributes levels that vary in each scenario. The data collected  
55  
56  
57  
58  
59  
60

1  
2  
3 can be used to assess the relative importance of each attribute and acceptable trade-offs among  
4  
5 attributes. An estimate of preference can be described as the marginal utility for a given attribute  
6  
7 level. Marginal utility can be positive or negative, with numbers farther from zero indicating a  
8  
9 stronger preference. Monetary costs can be included to produce willingness-to-pay estimates.  
10  
11  
12  
13

### 14 15 16 17 *Study setting and population*

18  
19  
20 This study was conducted at the R Adams Cowley Shock Trauma Center in Baltimore, Maryland  
21  
22 and received prior approval by the Institutional Review Board at the University of Maryland  
23  
24 School of Medicine. All adult ( $\geq 18$  years) patients treated with pelvic or acetabular fractures or  
25  
26 an operative extremity fracture were assessed for eligibility from November 2015 through  
27  
28 February 2016. Patients who were unable to consent due to intubation or altered mental status  
29  
30 and non-English speaking patients were excluded. Upon written consent, patients were enrolled  
31  
32 in the study as inpatients or at an outpatient follow-up appointment within 4 months from their  
33  
34 initial admission for their injury.  
35  
36  
37  
38  
39  
40  
41  
42

### 43 *Study design*

44  
45  
46 The attributes and their corresponding levels were selected based on a literature review, patient  
47  
48 interviews, expert consultation, and a retrospective review of patient outcomes. Medication  
49  
50 attributes used in the DCE included medication administration route (oral tablet vs. subcutaneous  
51  
52 injection), cost, possible side effects including bruising or stomach pain, risk of having a  
53  
54 bleeding complication that requires a blood transfusion, risk of having a wound complication that  
55  
56  
57  
58  
59  
60

1  
2  
3 requires another operation, risk of VTE requiring therapeutic anticoagulation for 6 months, and  
4 risk of death due to PE. These attributes were chosen to reflect medication qualities that patients  
5 are aware of when taking medications (route, cost, side effects) and clinically-important  
6 outcomes. Values for these attributes were based on available literature and clinical experience  
7 with two commonly prescribed VTE prophylaxis medications in this population: LMWH (a  
8 subcutaneous injection) and aspirin (an oral tablet). Attributes were not reflective of other oral  
9 anticoagulants because those medications are typically used for treatment of VTE events rather  
10 than prevention, and the focus of this DCE is preferences for prophylaxis administered to prevent  
11 VTE events.  
12  
13  
14  
15  
16  
17  
18  
19  
20  
21  
22  
23  
24

25 Forty choice sets were developed using a Bayesian D-optimal design with JMP Version 12  
26 software (SAS Institute, Cary, NC) to ensure maximum variation in attribute comparison. The 40  
27 choice sets were then randomly divided into four surveys, each with 10 choice sets, to minimize  
28 respondent burden. As documented by Sandor et al,<sup>27</sup> using heterogeneous designs produce  
29 substantial improvements in efficiency over a single survey and provides more precision in  
30 estimating true parameters. Each choice set compared two hypothetical VTE prophylaxis  
31 medications described by their attributes (**Figure 1**). Patients were randomly assigned one of the  
32 four self-administered surveys. A member of the research staff was available for questions as the  
33 study participant completed the survey. Demographic data including age, sex, race (as defined by  
34 the participant), type of injury, Injury Severity Score, American Society of Anesthesiologists  
35 (ASA) physical status, income, health insurance status, days on prophylaxis, and timing of  
36 recruitment (inpatient vs. outpatient) was collected from both the survey and the medical record.  
37  
38  
39  
40  
41  
42  
43  
44  
45  
46  
47  
48  
49  
50  
51  
52  
53  
54  
55  
56  
57  
58  
59  
60

The type of VTE prophylaxis was not collected as part of the study. However, at the time of the

1  
2  
3 study, VTE prophylaxis by LMWH was the standard hospital protocol and it is reasonable to  
4  
5 assume this was prescribed to all study participants unless there was a contraindication.  
6  
7

8  
9 The target sample size for this study was derived by the Rule of Thumb calculation described by  
10  
11 Orme and our a priori decision to conduct multiple subgroup analyses.<sup>28</sup> Based on this  
12  
13 calculation,<sup>28</sup> we determined that a sample of 25 study participants would be required in each  
14  
15 possible sub-group category for adequate statistical power. Given known proportions of  
16  
17 admission data for this population, a sample size exceeding 200 participants was required to  
18  
19 adequately assess heterogeneity in preferences, particularly on sex, race, and health insurance  
20  
21 status.  
22  
23  
24  
25  
26  
27  
28

### 29 *Data Analysis*

30  
31  
32 Data collected through the DCE survey allows the quantification of and statistical inference  
33  
34 about the relative importance of VTE prophylaxis medication attributes. A multinomial logit  
35  
36 model,<sup>29,30</sup> with effects coding, was used to estimate patient preferences using marginal utility,  
37  
38 willingness-to-pay (WTP), and acceptable trade-off estimates for a 1% reduction in VTE  
39  
40 complications or side effects. Marginal utility is a measure of patient preference, with the  
41  
42 estimate signifying the strength and direction of one's preference towards the attribute. With this  
43  
44 analysis, we are able to determine the relative magnitude of patient preferences to avoid VTE-  
45  
46 related complications in association with their medication choice. Preference heterogeneity was  
47  
48 subsequently assessed by adding an interaction term into the model with a priori determined  
49  
50 variables of interest. These variables included age (categorized as <40, 40 – 59, >60), sex, race,  
51  
52 ASA status ( $\leq 2$  vs.  $> 2$ ), the location of primary injury (upper extremity vs. lower extremity),  
53  
54  
55  
56  
57  
58  
59  
60



1  
2  
3 household income (categorized as  $\leq$ \$20,000, \$20,000 - \$49,999, \$50,000 - \$74,999,  $\geq$ \$75,0000),  
4  
5 health insurance status (any vs. none), and the location of recruitment. All data analysis was  
6  
7 conducted using the Choice Modeling platform in JMP Version 12.  
8  
9  
10

## 11 12 13 14 15 **Results**

16  
17  
18 Of the 310 patients screened for participation, 50 were ineligible (40 unable to consent due to  
19  
20 altered mental status, 8 non-English speaking, 2 contraindicated for VTE prophylaxis) and 28  
21  
22 (11%) patients refused participation. Of the 232 patients included in the analysis, the mean age  
23  
24 was 47.9 years, with 56.9% male, and 66.8% were white. The majority of participants had a  
25  
26 lower extremity injury (83.6%), with a mean injury severity score of 11.7, and were fully insured  
27  
28 (83.1%) (**Table 1**).  
29  
30  
31

32  
33 Patients most strongly preferred a reduction in risk of death by PE (marginal utility, 4.57;  
34  
35  $P<0.0001$ ), distantly followed by a reduction in the risk of VTE requiring therapeutic  
36  
37 anticoagulation, wound complications requiring another surgery, and bleeding complications  
38  
39 requiring a transfusion (**Table 2**). Patients were willing to pay \$1686.90 for a 1% absolute  
40  
41 reduction in risk of death due to PE compared to \$92.29 or less for a 1% absolute reduction in  
42  
43 any of the other measured outcome variables. Patients also preferred to take oral tablets  
44  
45 (marginal utility, 0.16;  $P<0.0001$ ) and were willing to pay \$117.45 to receive prophylaxis via  
46  
47 oral route over subcutaneous injection. Possible medication side effects, such as stomach pain or  
48  
49 bruising, did not significantly influence patient preferences ( $P>0.1$ ).  
50  
51  
52

53  
54  
55 To change patient preference in favor of subcutaneous injections requires a 6.98% absolute  
56  
57 reduction in the risk of bleeding complications requiring transfusion, a 4.53% absolute reduction  
58  
59  
60

1  
2  
3 in the risk of wound complications requiring reoperation, and a 1.27% absolute reduction in risk  
4  
5 of VTE requiring therapeutic anticoagulation (**Table 3**). In contrast, only a 0.07% absolute  
6  
7 reduction in risk of death due to PE was needed to change patient preference.  
8  
9

10  
11 In our subgroup analyses examining heterogeneity in preferences, patients who were female,  
12  
13 white, or had lower extremity injuries demonstrated significantly stronger preference for oral  
14  
15 VTE prophylaxis over subcutaneous injections ( $P<0.05$ ) (**Table 4**). Patients with upper extremity  
16  
17 injuries valued a reduction in risk of bleeding complications more than patients with lower  
18  
19 extremity injuries ( $P=0.01$ ). Patients who were recruited as an inpatient valued a reduction in risk  
20  
21 of wound complications requiring reoperation more than patients who were recruited from the  
22  
23 outpatient clinic ( $P<0.01$ ). There were no other significant associations between the tested  
24  
25 covariates and our included VTE prophylaxis attributes.  
26  
27  
28  
29  
30  
31  
32  
33

## 34 **Discussion**

35  
36  
37 Consistent with previous studies,<sup>23</sup> our study demonstrates a strong patient preference for oral  
38  
39 VTE prophylaxis over subcutaneous injection when all other relevant attributes are equal.  
40  
41 However, patients only required a small reduction in the absolute risk of death due to PE to  
42  
43 change their preference in favor of a subcutaneous injection. When choosing between VTE  
44  
45 prophylaxis regimens, patients most valued (in order): risk of death due to PE, risk of VTE  
46  
47 requiring therapeutic anticoagulation, risk of wound complications requiring reoperation, and  
48  
49 risk of bleeding complications requiring transfusion. A defined reduction in any of these  
50  
51 outcomes could change patient preference to favor the subcutaneous injection route. In addition,  
52  
53  
54  
55  
56  
57  
58  
59  
60

1  
2  
3 underlying patient factors such as sex, race, type of injury, and inpatient status led to significant  
4  
5 heterogeneity in patient preferences.  
6  
7

8  
9 To our knowledge, our study is the first to assess the weight of patient-valued outcomes  
10  
11 regarding potential risks and complications of VTE prophylaxis. The study also determined  
12  
13 patient characteristics associated with heterogeneity in their preferences. Previous studies have  
14  
15 shown that patient refusal is a common reason for missed VTE doses and increases the risk of a  
16  
17 VTE event.<sup>20-23</sup> Patient preference for oral medications is also well-documented.<sup>23,31</sup> Our study  
18  
19 also demonstrates a strong preference for oral medications, but our results show that this  
20  
21 preference can change if the risk of the aforementioned patient-important outcomes is high  
22  
23 enough. Patients were particularly concerned about the risk of death due to PE, requiring only a  
24  
25 0.07% absolute reduction in risk of death to change patient preference in favor of a subcutaneous  
26  
27 injection. In addition, only relatively small reductions in the risk of other outcomes were required  
28  
29 to change patient preference. Furthermore, the preference for route varied significantly  
30  
31 depending on the patient's sex, race, type of injury, and inpatient status.  
32  
33  
34  
35  
36  
37

38 While the design of the DCE enables the assessment of risk-benefit trade-offs among subgroups,  
39  
40 it does not allow for qualitative analysis of patient preferences. As a result, we are only able to  
41  
42 speculate as to why patients valued certain outcomes more than others. In addition, the choice  
43  
44 sets were hypothetical scenarios and patient's actual choices may be different. The greater value  
45  
46 placed on risk of death due to PE compared to other outcome measures could be a result of death  
47  
48 being the easiest outcome variable for the average patient to understand. We were unable to  
49  
50 control for patient disposition in our analysis (home vs. rehab), but we did compare responses of  
51  
52 inpatients to outpatients. Patients who were recruited as an inpatient were more concerned about  
53  
54 the risk of reoperation than patients recruited as outpatients, potentially because their injury and  
55  
56  
57  
58  
59  
60

1  
2  
3 initial operation were more recent in their memory. In addition, study participants had varying  
4 lengths of VTE prophylaxis prescribed at time of recruitment and some patients were closer to  
5 time of injury and initial operation than others. Although, when assessed, time since injury did  
6 not affect patient preferences.  
7  
8  
9  
10  
11

12  
13 Some participants had personal experience with one or more of the measured outcomes while  
14 others had no history of complications, which we were unable to control for in our final analysis.  
15  
16 In the same manner, the mean ISS of our sample was 11.7, likely as a result of many patients  
17 having isolated orthopaedic injuries as well as more severely injured patients not having the  
18 mental capacity to complete the survey. ISS ranged from 4-34, but there is the possibility that our  
19 results may suffer from some respondent bias if trying to extrapolate to a more severely injured  
20 population. Lastly, we did not collect data on patient education level which could affect the  
21 patient's understanding of certain outcomes, however income and insurance level may be  
22 surrogate markers for education and were included in the analysis.  
23  
24  
25  
26  
27  
28  
29  
30  
31  
32  
33  
34  
35

36 In the current era of patient-centered healthcare, it is important that we consider all outcomes that  
37 patients value and the heterogeneity in those preferences when conducting clinical comparative  
38 effectiveness research and when making clinical guidelines in order to improve healthcare  
39 delivery and reduce cost.<sup>19,32,33</sup> Our data demonstrate that orthopaedic trauma patients prefer  
40 VTE prophylaxis by oral tablet to prophylaxis by subcutaneous injection when all other relevant  
41 attributes are equal. However, the risk of death due to PE is the dominant concern when choosing  
42 a regimen. Our study is the first to document the value patients place on various clinically-  
43 important outcomes related to VTE prophylaxis. In addition, we define the underlying patient  
44 factors that contribute to variation in VTE prophylaxis preferences with risk-benefit trade-offs  
45 among subgroups in this important area of ongoing debate. In the era of patient-centered  
46  
47  
48  
49  
50  
51  
52  
53  
54  
55  
56  
57  
58  
59  
60

1  
2  
3 healthcare, future studies and clinical guideline recommendations comparing available VTE  
4  
5 prophylaxis regimens should focus on the outcomes most important to patients and incorporate  
6  
7  
8 patient trade-off estimates to ensure their work is reflective of patient preferences.  
9  
10  
11  
12  
13  
14  
15  
16  
17  
18  
19  
20  
21  
22  
23  
24  
25  
26  
27  
28  
29  
30  
31  
32  
33  
34  
35  
36  
37  
38  
39  
40  
41  
42  
43  
44  
45  
46  
47  
48  
49  
50  
51  
52  
53  
54  
55  
56  
57  
58  
59  
60

For peer review only

**Table 1** Characteristics of orthopaedic fracture participants (n=232)

| Characteristic                      | Mean (SD)   |
|-------------------------------------|-------------|
| Male, No. (%)                       | 132 (56.9)  |
| Age, y                              | 47.9 (17.7) |
| Race, No. (%)                       |             |
| White                               | 155 (66.8)  |
| Black                               | 62 (26.7)   |
| Other                               | 8 (3.4)     |
| Hispanic                            | 7 (3.0)     |
| Primary Orthopaedic Injury, No. (%) |             |
| Lower Extremity                     | 194 (83.6)  |
| Upper Extremity                     | 38 (16.4)   |
| ASA, <sup>1</sup> No. (%)           |             |
| 1                                   | 21 (9.1)    |
| 2                                   | 117 (50.4)  |
| 3                                   | 81 (34.9)   |
| 4                                   | 11 (4.7)    |
| Unknown                             | 2 (0.9)     |
| Injury severity score (ISS)         | 11.7 (6.7)  |
| Income, \$USD, No. (%)              |             |
| <\$10,000                           | 46 (19.8)   |
| \$10,000 - \$19,999                 | 20 (8.6)    |
| \$20,000 - \$34,999                 | 35 (15.1)   |
| \$35,000-\$49,999                   | 24 (10.3)   |
| \$50,000 - \$74,999                 | 26 (11.1)   |
| \$75,000 - \$100,000                | 24 (10.3)   |
| >\$100,000                          | 35 (15.1)   |
| Unknown                             | 22 (9.5)    |
| Health Insurance, No. (%)           |             |
| Fully Insured                       | 193 (83.1)  |
| Partially Insured                   | 12 (5.2)    |
| Uninsured                           | 24 (10.3)   |
| Unknown                             | 3 (1.3)     |
| Timing of recruitment No. (%)       |             |
| In-patient                          | 78 (33.6)   |
| Out-patient                         | 154 (66.4)  |

**Notes:**

<sup>1</sup> The American Society of Anesthesiologists (ASA) physical status classification system for assessing pre-operative patient fitness.

<sup>2</sup> Injury Severity Score (ISS) is a well-validated score that assesses trauma severity based on a consensus-derived severity score that classifies each injury from six body regions (head or neck, face, chest,

1  
2  
3  
4  
5  
6  
7  
8  
9  
10  
11  
12  
13  
14  
15  
16  
17  
18  
19  
20  
21  
22  
23  
24  
25  
26  
27  
28  
29  
30  
31  
32  
33  
34  
35  
36  
37  
38  
39  
40  
41  
42  
43  
44  
45  
46  
47  
48  
49  
50  
51  
52  
53  
54  
55  
56  
57  
58  
59  
60

abdomen, extremities, external). A score greater than 15 is commonly referred to as a major trauma (or polytrauma).

For peer review only

**Table 2** Patient preferences and valuation of venous thromboembolism prophylaxis attributes

| Attribute                                     | Level                  | Marginal Utility | 95% CI        | WTP       | P Value |
|-----------------------------------------------|------------------------|------------------|---------------|-----------|---------|
| Route                                         | Oral tablet            | 0.16             | 0.11 - 0.21   | \$117.45  | <0.0001 |
|                                               | Subcutaneous injection | -0.16            | -0.21 – -0.11 | -         | -       |
| Side Effects                                  | Bruising on leg        | -0.04            | -0.11 – 0.02  | -\$45.94  | 0.11    |
|                                               | Stomach pain           | -0.04            | -0.12 – 0.04  | -\$44.08  | -       |
|                                               | No side effects        | 0.08             | 0.003 – 0.16  | \$45.08   | -       |
| Bleeding complications requiring transfusion  | Reduce risk by 1%      | 0.05             | 0.04 – 0.05   | \$16.83   | <0.0001 |
| Wound complications requiring another surgery | Reduce risk by 1%      | 0.07             | 0.06 – 0.08   | \$25.91   | <0.0001 |
| Blood clot requiring long-term medication     | Reduce risk by 1%      | 0.25             | 0.15 – 0.36   | \$92.29   | <0.0001 |
| Death due to PE                               | Reduce risk by 1%      | 4.57             | 3.26 – 5.89   | \$1686.90 | <0.0001 |
| Cost                                          | \$10 increase          | -0.03            | -0.04 – -0.02 | Reference | <0.0001 |

PE = pulmonary embolism; CI = confidence interval; WTP = willingness to pay

**Note:** Marginal utility quantifies the additional satisfaction gained by the patient for each described attribute/level. Negative marginal utility values signify an aversion to or dissatisfaction with the described attribute/level. All risk reductions are absolute. Willingness to pay for the route and side effects category is based on the full treatment course, not per dose. Willingness to pay for all other attributes are based on the incremental change in level.



**Table 3** The absolute risk reduction (ARR) of a potential complication that a patient would be willing to accept to change their route preference from oral to subcutaneous injection prophylaxis

| <b>Attribute</b>                              | <b>Acceptable ARR Trade-off</b> |
|-----------------------------------------------|---------------------------------|
| Bleeding complications requiring transfusion  | 6.98%                           |
| Wound complications requiring another surgery | 4.53%                           |
| Blood clot requiring long-term medication     | 1.27%                           |
| Death due to PE                               | 0.07%                           |

ARR = absolute risk reduction; PE = pulmonary embolism

For peer review only

**Table 4** Sub-group analysis quantifying heterogeneity in patient preferences

| Attribute                                     | Level                                        | Sub-Group                 | Marginal Utility | 95% CI         | WTP      | P Value |
|-----------------------------------------------|----------------------------------------------|---------------------------|------------------|----------------|----------|---------|
| Route                                         | Take oral tablet over subcutaneous injection | Sex [Female]              | 0.07             | 0.02 – 0.11    | \$201.24 | <0.01   |
|                                               |                                              | Sex [Male]                | -0.07            | -0.11 - -0.02  | \$66.79  |         |
|                                               |                                              | Race [White]              | 0.09             | 0.03 – 0.14    | \$182.23 | <0.01   |
|                                               |                                              | Race [Black]              | -0.09            | -0.14 - -0.03  | \$18.48  |         |
| Bleeding complications requiring transfusion  | Reduce risk by 1%                            | Injury [Lower Extremity]  | 0.08             | 0.02 – 0.15    | \$132.38 | 0.01    |
|                                               |                                              | Injury [Upper Extremity]  | -0.08            | -0.15 - -0.02  | \$18.98  |         |
| Wound complications requiring another surgery | Reduce risk by 1%                            | Recruitment [In-patient]  | 0.02             | 0.003 – 0.03   | \$46.32  | <0.01   |
|                                               |                                              | Recruitment [Out-patient] | -0.02            | -0.03 – -0.003 | \$20.24  |         |

CI = confidence interval; WTP = willingness to pay

**Note:** Marginal utility quantifies the additional satisfaction gained by the patient for each described attribute/level. Negative marginal utility values signify an aversion to or dissatisfaction with the described attribute/level. All willingness to pay values are presented in reference to a less preferred option. For example, both females and males prefer oral tablets compared to a subcutaneous injection. However, females are willing to pay more for an oral tablet over a subcutaneous injection than males are willing to pay for that same tradeoff (oral tablet over subcutaneous injection). Willingness to pay values for attributes with continuous levels estimate the willingness to pay for an additional 1% absolute reduction in risk.

1  
2  
3  
4  
5  
6  
7  
8  
9  
10  
11  
12  
13  
14  
15  
16  
17  
18  
19  
20  
21  
22  
23  
24  
25  
26  
27  
28  
29  
30  
31  
32  
33  
34  
35  
36  
37  
38  
39  
40  
41  
42  
43  
44  
45  
46  
47  
48  
49  
50  
51  
52  
53  
54  
55  
56  
57  
58  
59  
60

**Figure 1:** Sample question from the discrete choice experiment survey administered to participants. In each question the values for each hypothetical medication are varied.

For peer review only

## Acknowledgments

The authors thank all of the respondents for their time and participation in the study.

## Author Contribution

BH contributed to the literature search, study design, data collection, data interpretation, writing, and critical revision. NNO contributed to the literature search, study design, data analysis, data interpretation, writing, and critical revision. CDM contributed to the data interpretation and critical revision. DS, TTM, HJ, RVO, and GPS contributed to the literature search, study design, data interpretation, and critical revision. RC contributed to the study design, data analysis, data interpretation, and critical revision. All authors have approved the final version of the article submitted and agree to be accountable for all aspects of the work.

## Funding

Research reported in this manuscript was funded through a Patient-Centered Outcomes Research Institute (PCORI) Award (PCS-1511-32745). The views in this publication are solely the responsibility of the authors and do not necessarily represent the views of the Patient-Centered Outcomes Research Institute (PCORI), its Board of Governors or Methodology Committee.

## Competing interests

1  
2  
3 All authors have completed the ICMJE uniform disclosure form at  
4  
5 [www.icmje.org/coi\\_disclosure.pdf](http://www.icmje.org/coi_disclosure.pdf) and declare: no support from any organisation for the  
6  
7 submitted work; no financial relationships with any organisations that might have an interest in  
8  
9 the submitted work in the previous three years other than those listed below; no other  
10  
11 relationships or activities that could appear to have influenced the submitted work apart from the  
12  
13 following:  
14  
15

16  
17  
18 Dr. Mullins reports consulting with Bayer, Daiichi Sankyo, Janssen/J&J, Mundipharma, Novo  
19  
20 Nordisk, and Pfizer and receiving grants from Bayer, Novartis, Merck, and Pfizer. Dr. Stein  
21  
22 reports receiving grants from the US Air Force and serves as an advisor for Decisio Health, Inc.  
23  
24 Dr. Manson reports consulting with Stryker, Globus, and Smith & Nephew, being paid for expert  
25  
26 testimony from various law firms, and payment for lectures by the Maine Review Course. Dr.  
27  
28 O'Toole reports consulting with Coorstek (Zimmer) and Smith & Nephew and receiving  
29  
30 royalties from Coorstek. Dr. Slobogean reports payments for presenting by Zimmer Biomet. No  
31  
32 other disclosures were reported.  
33  
34  
35  
36  
37  
38  
39  
40  
41

#### 42 **Data sharing statement**

43  
44 No additional data are available.  
45  
46  
47  
48  
49  
50  
51  
52  
53  
54  
55  
56  
57  
58  
59  
60

## References

1. Shackford SR, Moser KM. Deep venous thrombosis and pulmonary embolism in trauma patients. *J Intensive Care Med.* 1988; 3(2):87-98.
2. Geerts WH, Code KI, Jay RM, et al. A prospective study of venous thromboembolism after major trauma. *N Engl J Med.* 1994;331(24):1601–1606.
3. O'Malley KF, Ross SE. Pulmonary embolism in major trauma patients. *J Trauma.* 1990;30(6):748–750.
4. Sevitt S, Gallagher N. Venous thrombosis and pulmonary embolism. A clinico-pathological study in injured and burned patients. *Br J Surg.* 1961;48:475–489.
5. Shackford SR, Davis JW, Hollingsworth-Fridlund P, et al. Venous thromboembolism in patients with major trauma. *Am J Surg.* 1990;159(4):365–369.
6. Abelseth G, Buckley RE, Pineo GE, et al. Incidence of deep-vein thrombosis in patients with fractures of the lower extremity distal to the hip. *J Orthop Trauma.* 1996;10(4):230–235.
7. Rogers FB. Venous thromboembolism in trauma patients: a review. *Surgery.* 2001;130(1):1–12.
8. Hak DJ. Prevention of venous thromboembolism in trauma and long bone fractures. *Curr Opin Pulm Med.* 2001;7(5):338–343.
9. Sannard JP, Lopez-Ben RR, Volgas DA, et al. Prophylaxis against deep-vein thrombosis following trauma: a prospective, randomized comparison of mechanical and

- 1  
2  
3 pharmacologic prophylaxis. *J Bone Joint Surg Am*. 2006;88(2):261-266.  
4  
5  
6  
7 10. Falck-Ytter Y, Francis CW, Johanson NA, et al. Prevention of VTE in orthopaedic  
8 surgery patients: Antithrombotic Therapy and Prevention of Thrombosis, 9th ed:  
9 American College of Chest Physicians Evidence-Based Clinical Practice Guidelines.  
10 *Chest*. 2012;141(2 Suppl):e278S–325S.  
11  
12  
13  
14  
15  
16  
17 11. Hill J, Treasure T, National Clinical Guideline Centre for Acute and Chronic Conditions.  
18 Reducing the risk of venous thromboembolism in patients admitted to hospital: summary  
19 of NICE guidance. *BMJ*. 2010;340:c95.  
20  
21  
22  
23  
24  
25  
26 12. Mont MA, Jacobs JJ. Preventing venous thromboembolic disease in patients undergoing  
27 elective hip and knee arthroplasty. *J Am Acad Orthop Surg*. 2011;19(12):768–776.  
28  
29  
30  
31 13. Anderson DR, Dunbar MJ, Bohm ER, et al. Aspirin versus low-molecular-weight heparin  
32 for extended venous thromboembolism prophylaxis after total hip arthroplasty: a  
33 randomized trial. *Ann Intern Med*. 2013;158(11):800-806.  
34  
35  
36  
37  
38  
39 14. Sahebally SM, Healy D, Walsh SR. Aspirin in the primary prophylaxis of venous  
40 thromboembolism in surgical patients. *Surgeon*. 2015;13(6):348-58.  
41  
42  
43  
44  
45 15. Drescher FS, Sirovich BE, Lee A, et al. Aspirin versus anticoagulation for prevention of  
46 venous thromboembolism major lower extremity orthopedic surgery: a systematic review  
47 and meta-analysis. *J Hosp Med*. 2014; 9(9):579-585.  
48  
49  
50  
51  
52  
53 16. Barrera LM, Perel P, Ker K, et al. Thromboprophylaxis for trauma patients. *Cochrane*  
54 *Database Syst Rev*. 2013;3:CD008303.  
55  
56  
57  
58  
59  
60

- 1  
2  
3  
4  
5  
6  
7  
8  
9  
10  
11  
12  
13  
14  
15  
16  
17  
18  
19  
20  
21  
22  
23  
24  
25  
26  
27  
28  
29  
30  
31  
32  
33  
34  
35  
36  
37  
38  
39  
40  
41  
42  
43  
44  
45  
46  
47  
48  
49  
50  
51  
52  
53  
54  
55  
56  
57  
58  
59  
60
17. Sagi HC, Ahn J, Ciesla D, et al. Venous Thromboembolism Prophylaxis in Orthopaedic Trauma Patients: A Survey of OTA Member Practice Patterns and OTA Expert Panel Recommendations. *J Orthop Trauma*. 2015;29(10):e355-62.
  18. MacLean S, Mulla S, Akl EA, et al. Patient values and preferences in decision making for antithrombotic therapy: a systematic review. American College of Chest Physicians evidenced-based clinical practice guidelines. Antithrombotic Therapy and Prevention of Thrombosis, 9<sup>th</sup> ed. *Chest*. 2012;141(2 Suppl):e1S-23S.
  19. Krahn M, Naglie G. The next step in guideline development: incorporating patient preferences. *JAMA*. 2008;300(4):436-438.
  20. Shermock KM, Lau BD, Haut ER, et al. Patterns of non-administration of ordered doses of venous thromboembolism prophylaxis: implications for novel intervention strategies. *PLoS One*. 2013;8(6):e66311.
  21. Haut ET, Lau BD, Kraus PS, et al. Preventability of Hospital-Acquired Venous Thromboembolism. *JAMA Surg*. 2015;150(9):912-915.
  22. Louis SG, Sato M, Geraci T, et al. Correlation of missed doses of enoxaparin with increased incidence of deep vein thrombosis in trauma and general surgery patients. *JAMA Surg*. 2014;149(4):365-370.
  23. Wong A, Kraus PS, Lau BD, et al. Patient preferences regarding pharmacologic venous thromboembolism prophylaxis. *J Hosp Med*. 2015;10(2):108-111.



- 1  
2  
3  
4 24. Bridges JF, Hauber AB, Marshall D, et al. Conjoint analysis applications in health—a  
5 checklist: a report of the ISPOR Good Research Practices for Conjoint Analysis Task  
6 Force. *Value Health*. 2011;14(4):403-413.  
7  
8  
9  
10  
11 25. Luyten J, Kessels R, Goos P, et al. Public preferences for prioritizing preventative and  
12 curative health care interventions: a discrete choice experiment. *Value Health*.  
13 2015;18(2):224-233.  
14  
15  
16  
17  
18  
19 26. Ryan M, Farrar S. Using conjoint analysis to elicit preferences for health care. *BMJ*.  
20 2000;320(7248):1530-1533.  
21  
22  
23  
24  
25 27. Sándor Z, Wedel M. Heterogeneous conjoint choice designs. *J Market Res*.  
26 2001;42(2):210-218.  
27  
28  
29  
30 28. Orme B. Sample size issues for conjoint analysis studies. Sequim: Sawtooth Software  
31 Technical Paper; 1998.  
32  
33  
34  
35  
36 29. McFadden D. Econometric models for probabilistic choice among products. *Journal of*  
37 *Business*. 1980 Jul 1:S13-29.  
38  
39  
40  
41 30. Louviere JJ, Flynn TN, Carson RT. Discrete choice experiments are not conjoint analysis.  
42 *J Choice Model*. 2010;3:57–72.  
43  
44  
45  
46  
47 31. Jin J, Sklar GE, Min Sen Oh V, et al. Factors affecting therapeutic compliance: a review  
48 from the patient’s perspective. *Ther Clin Risk Manag*. 2008;4(1):269-286.  
49  
50  
51  
52  
53 32. Tunis SR, Clarke M, Gorst SL, et al. Improving the relevance and consistency of  
54 outcomes in comparative effectiveness research. *J Comp Eff Res*. 2016;5(2):193-205.  
55  
56  
57  
58  
59  
60

- 1  
2  
3 33. Price-Haywood EG. Clinical comparative effectiveness research through the lens of  
4  
5 healthcare decisionmakers. *Ochsner J.* 2015;15(2):154-161.  
6  
7  
8  
9  
10  
11  
12  
13  
14  
15  
16  
17  
18  
19  
20  
21  
22  
23  
24  
25  
26  
27  
28  
29  
30  
31  
32  
33  
34  
35  
36  
37  
38  
39  
40  
41  
42  
43  
44  
45  
46  
47  
48  
49  
50  
51  
52  
53  
54  
55  
56  
57  
58  
59  
60

For peer review only

1  
2  
3  
4  
5  
6  
7  
8  
9  
10  
11  
12  
13  
14  
15  
16  
17  
18  
19  
20  
21  
22  
23  
24  
25  
26  
27  
28  
29  
30  
31  
32  
33  
34  
35  
36  
37  
38  
39  
40  
41  
42  
43  
44  
45  
46  
47  
48  
49  
50  
51  
52  
53  
54  
55  
56  
57  
58  
59  
60

Which medication would you prefer?

|                                                                                               | Medication A                                                                                         | Medication B                                                                                           |
|-----------------------------------------------------------------------------------------------|------------------------------------------------------------------------------------------------------|--------------------------------------------------------------------------------------------------------|
| Type of daily medication                                                                      | Oral pill                                                                                            | Needle injection                                                                                       |
| What will it cost you                                                                         | \$100                                                                                                | \$50                                                                                                   |
| Possible side effect                                                                          | None                                                                                                 | Bruising on leg                                                                                        |
| Chance that you will have a bleeding complication and need a blood transfusion                | 10 out of 1000<br>  | 100 out of 1000<br> |
| Chance that you will have wound complication and need another operation                       | 50 out of 1000<br>  | 100 out of 1000<br> |
| Chance that you will have a blood clot and have to take medications for 6 months              | 20 out of 1000<br> | 10 out of 1000<br> |
| Chance of death due to a pulmonary embolism                                                   | 1 out of 1000<br> | 1 out of 1000<br> |
| Check one  | Prefer Medication A<br><input type="checkbox"/>                                                      | Prefer Medication B<br><input type="checkbox"/>                                                        |

Figure 1. Sample question from the discrete choice experiment survey administered to participants. In each question the values for each hypothetical medication are varied.

172x209mm (300 x 300 DPI)

STROBE Statement—Checklist of items that should be included in reports of *cross-sectional studies*

|                              | Item No | Recommendation                                                                                                                                                                                                                                                                                                                                                                                                     |
|------------------------------|---------|--------------------------------------------------------------------------------------------------------------------------------------------------------------------------------------------------------------------------------------------------------------------------------------------------------------------------------------------------------------------------------------------------------------------|
| <b>Title and abstract</b>    | 1       | (a) Indicate the study's design with a commonly used term in the title or the abstract<br><b>Page 1</b>                                                                                                                                                                                                                                                                                                            |
|                              |         | (b) Provide in the abstract an informative and balanced summary of what was done and what was found <b>Page 2</b>                                                                                                                                                                                                                                                                                                  |
| <b>Introduction</b>          |         |                                                                                                                                                                                                                                                                                                                                                                                                                    |
| Background/rationale         | 2       | Explain the scientific background and rationale for the investigation being reported<br><b>Page 4-5</b>                                                                                                                                                                                                                                                                                                            |
| Objectives                   | 3       | State specific objectives, including any prespecified hypotheses <b>Page 5</b>                                                                                                                                                                                                                                                                                                                                     |
| <b>Methods</b>               |         |                                                                                                                                                                                                                                                                                                                                                                                                                    |
| Study design                 | 4       | Present key elements of study design early in the paper <b>Page 5-6</b>                                                                                                                                                                                                                                                                                                                                            |
| Setting                      | 5       | Describe the setting, locations, and relevant dates, including periods of recruitment, exposure, follow-up, and data collection <b>Page 6</b>                                                                                                                                                                                                                                                                      |
| Participants                 | 6       | (a) Give the eligibility criteria, and the sources and methods of selection of participants <b>Page 6</b>                                                                                                                                                                                                                                                                                                          |
| Variables                    | 7       | Clearly define all outcomes, exposures, predictors, potential confounders, and effect modifiers. Give diagnostic criteria, if applicable <b>Page 6-7</b>                                                                                                                                                                                                                                                           |
| Data sources/<br>measurement | 8*      | For each variable of interest, give sources of data and details of methods of assessment (measurement). Describe comparability of assessment methods if there is more than one group <b>Page 7</b>                                                                                                                                                                                                                 |
| Bias                         | 9       | Describe any efforts to address potential sources of bias <b>Page 7-8</b>                                                                                                                                                                                                                                                                                                                                          |
| Study size                   | 10      | Explain how the study size was arrived at <b>Page 7</b>                                                                                                                                                                                                                                                                                                                                                            |
| Quantitative variables       | 11      | Explain how quantitative variables were handled in the analyses. If applicable, describe which groupings were chosen and why                                                                                                                                                                                                                                                                                       |
| Statistical methods          | 12      | (a) Describe all statistical methods, including those used to control for confounding<br><b>Page 7-8</b><br>(b) Describe any methods used to examine subgroups and interactions <b>Page 7-8</b><br>(c) Explain how missing data were addressed <b>Page 7-8</b><br>(d) If applicable, describe analytical methods taking account of sampling strategy<br>(e) Describe any sensitivity analyses <b>Page 7-8</b>      |
| <b>Results</b>               |         |                                                                                                                                                                                                                                                                                                                                                                                                                    |
| Participants                 | 13*     | (a) Report numbers of individuals at each stage of study—eg numbers potentially eligible, examined for eligibility, confirmed eligible, included in the study, completing follow-up, and analysed <b>Page 8</b><br>(b) Give reasons for non-participation at each stage <b>Page 8</b><br>(c) Consider use of a flow diagram                                                                                        |
| Descriptive data             | 14*     | (a) Give characteristics of study participants (eg demographic, clinical, social) and information on exposures and potential confounders <b>Page 8</b><br>(b) Indicate number of participants with missing data for each variable of interest                                                                                                                                                                      |
| Outcome data                 | 15*     | Report numbers of outcome events or summary measures <b>Page 8</b>                                                                                                                                                                                                                                                                                                                                                 |
| Main results                 | 16      | (a) Give unadjusted estimates and, if applicable, confounder-adjusted estimates and their precision (eg, 95% confidence interval). Make clear which confounders were adjusted for and why they were included <b>Page 9</b><br>(b) Report category boundaries when continuous variables were categorized <b>Page 9</b><br>(c) If relevant, consider translating estimates of relative risk into absolute risk for a |

|                          |    |                                                                                                                                                                                           |
|--------------------------|----|-------------------------------------------------------------------------------------------------------------------------------------------------------------------------------------------|
|                          |    | meaningful time period                                                                                                                                                                    |
| Other analyses           | 17 | Report other analyses done—eg analyses of subgroups and interactions, and sensitivity analyses <b>Page 9</b>                                                                              |
| <b>Discussion</b>        |    |                                                                                                                                                                                           |
| Key results              | 18 | Summarise key results with reference to study objectives <b>Page 9</b>                                                                                                                    |
| Limitations              | 19 | Discuss limitations of the study, taking into account sources of potential bias or imprecision. Discuss both direction and magnitude of any potential bias <b>Page 10-11</b>              |
| Interpretation           | 20 | Give a cautious overall interpretation of results considering objectives, limitations, multiplicity of analyses, results from similar studies, and other relevant evidence <b>Page 11</b> |
| Generalisability         | 21 | Discuss the generalisability (external validity) of the study results <b>Page 10</b>                                                                                                      |
| <b>Other information</b> |    |                                                                                                                                                                                           |
| Funding                  | 22 | Give the source of funding and the role of the funders for the present study and, if applicable, for the original study on which the present article is based <b>Page 17</b>              |

\*Give information separately for exposed and unexposed groups.

**Note:** An Explanation and Elaboration article discusses each checklist item and gives methodological background and published examples of transparent reporting. The STROBE checklist is best used in conjunction with this article (freely available on the Web sites of PLoS Medicine at <http://www.plosmedicine.org/>, Annals of Internal Medicine at <http://www.annals.org/>, and Epidemiology at <http://www.epidem.com/>). Information on the STROBE Initiative is available at [www.strobe-statement.org](http://www.strobe-statement.org).
